# Supplementary material for: Endogenous control genes in complex vascular tissue samples
Source: PubMed Central journal article supplement (PMC2779820; doi:10.1186/1471-2164-10-516), 2009-11-10

# Correlation between SD and No EC correlation metric

For real-time PCR: Each dot represents one gene

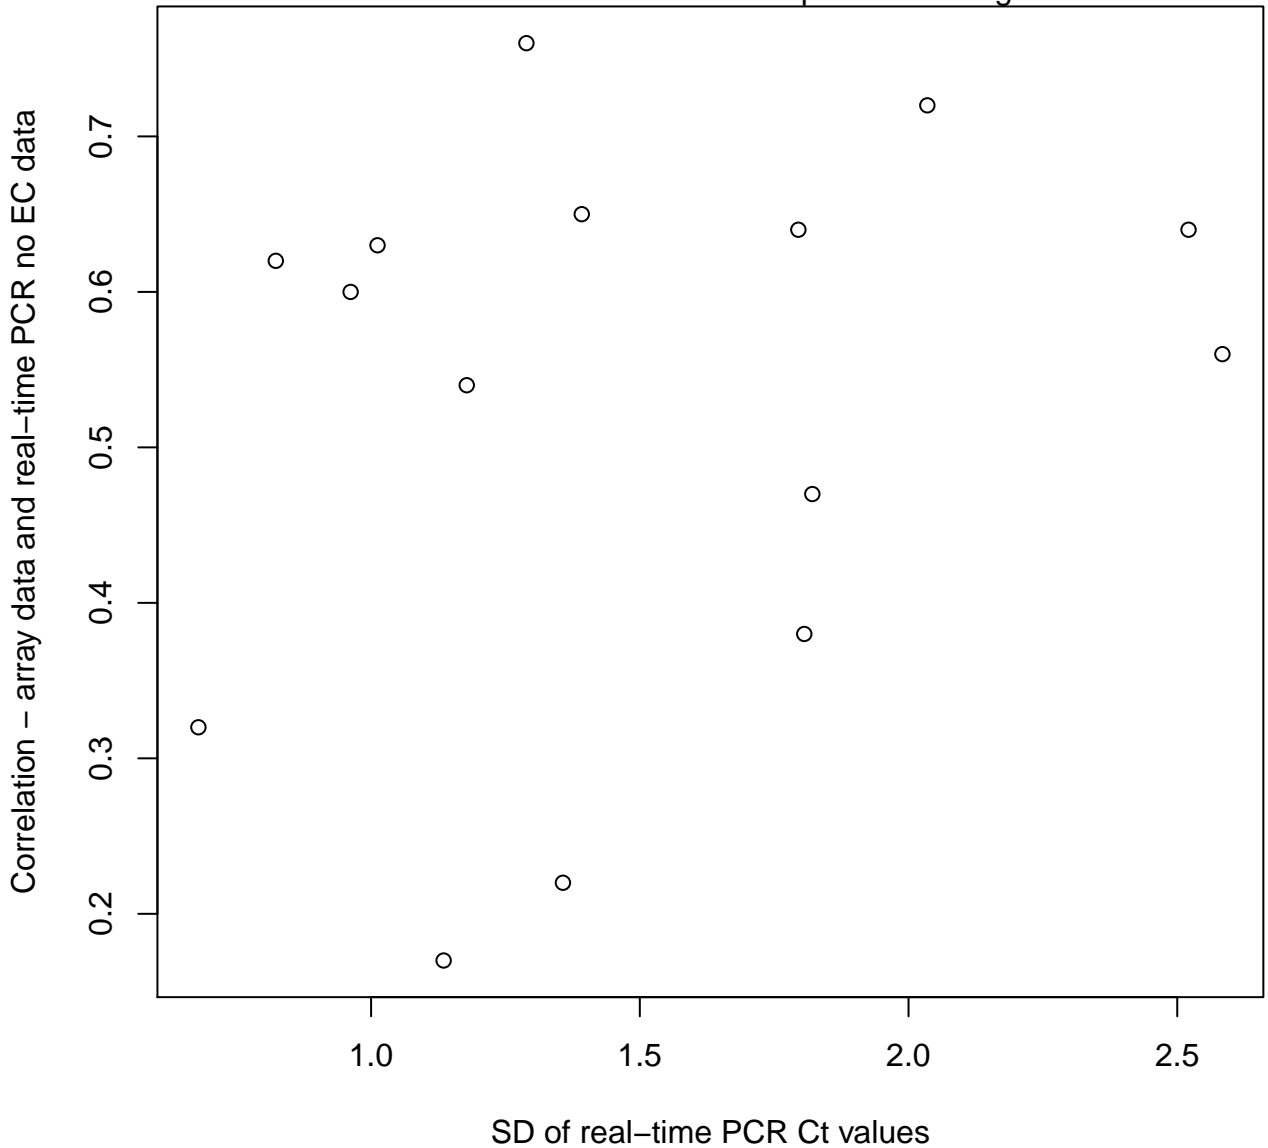

# Correlation between mean and No EC correlation metric

For real-time PCR: Each dot represents one gene

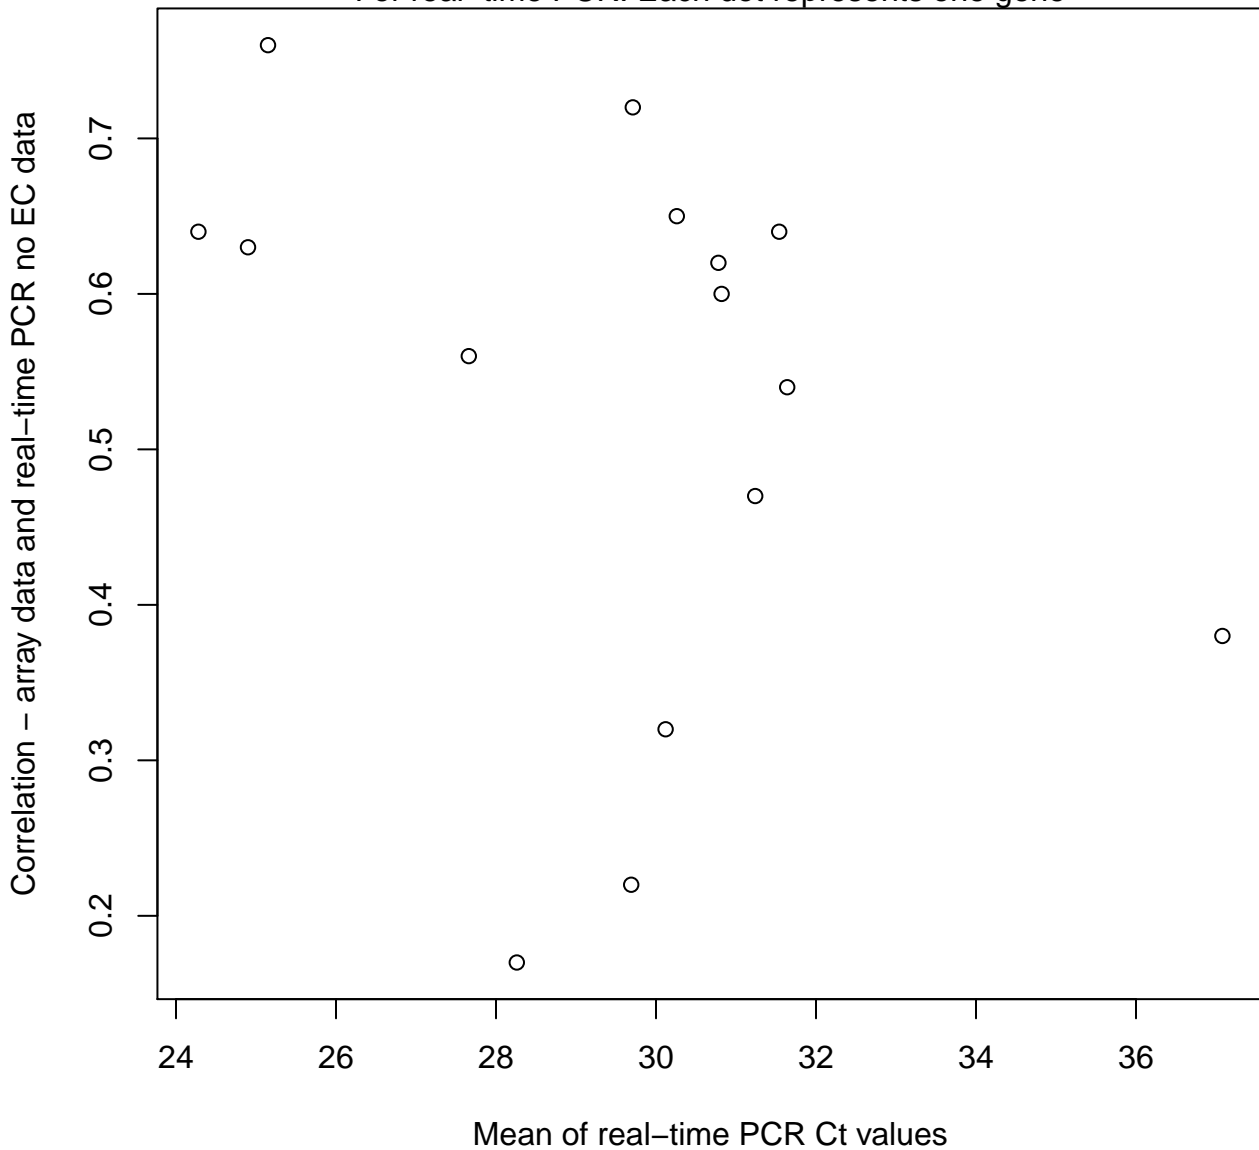

# Correlation between SD and PPIA\_RPLP0\_TBP correlation metric

For real-time PCR: Each dot represents one gene

Correlation – array data and real-time PCR PPIA\_RPLP0\_TBP normalized data

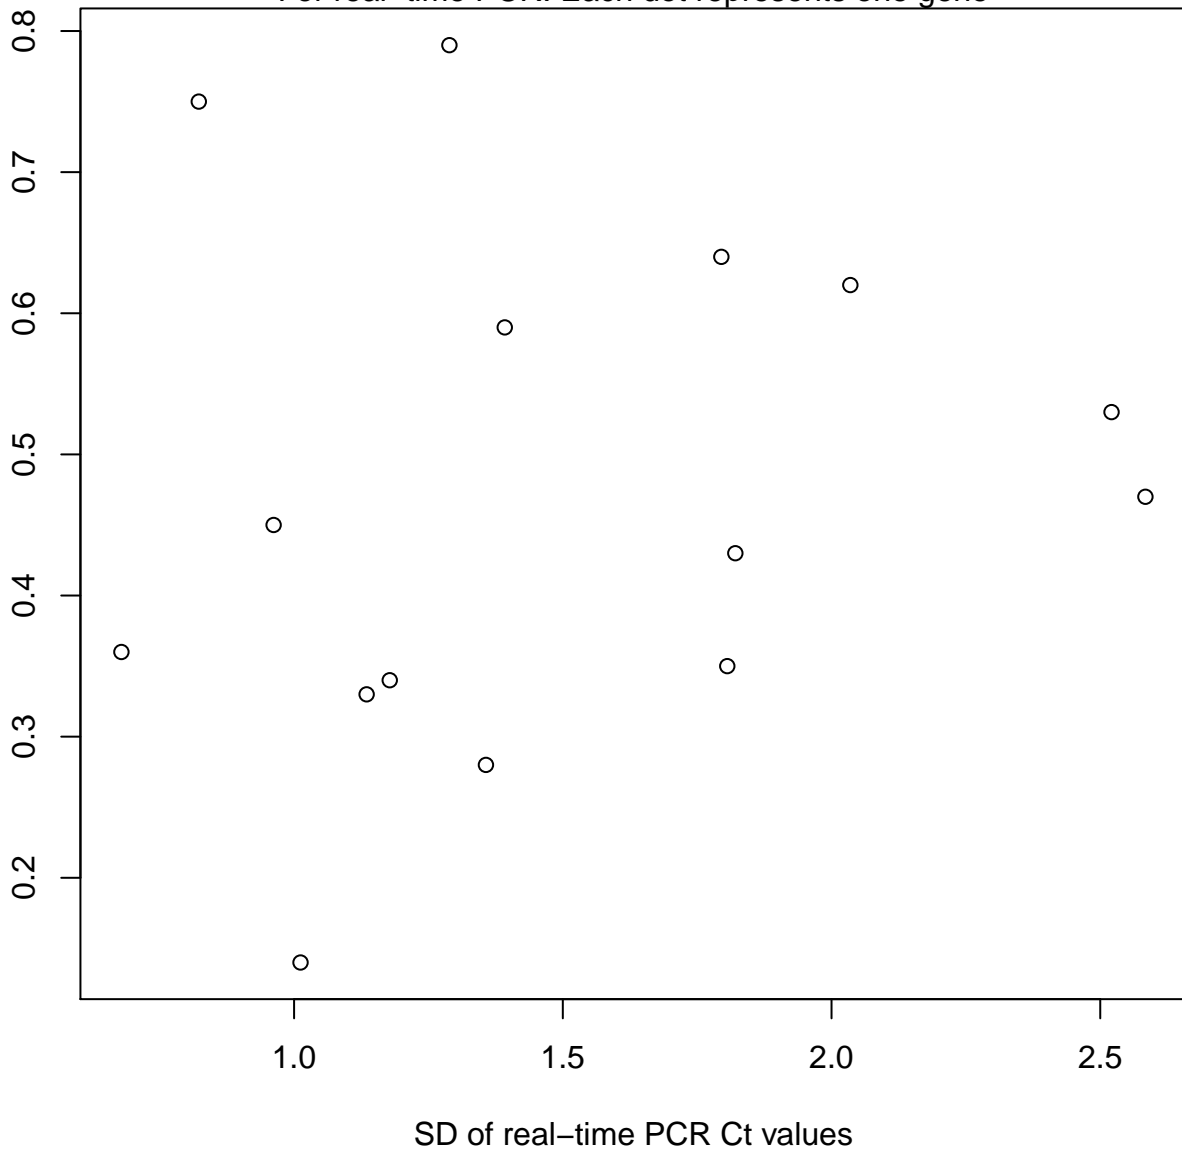

# Correlation between mean and PPIA\_RPLP0\_TBP correlation metric

For real-time PCR: Each dot represents one gene

Correlation - array data and real-time PCR PPIA\_RPLP0\_TBP normalized data

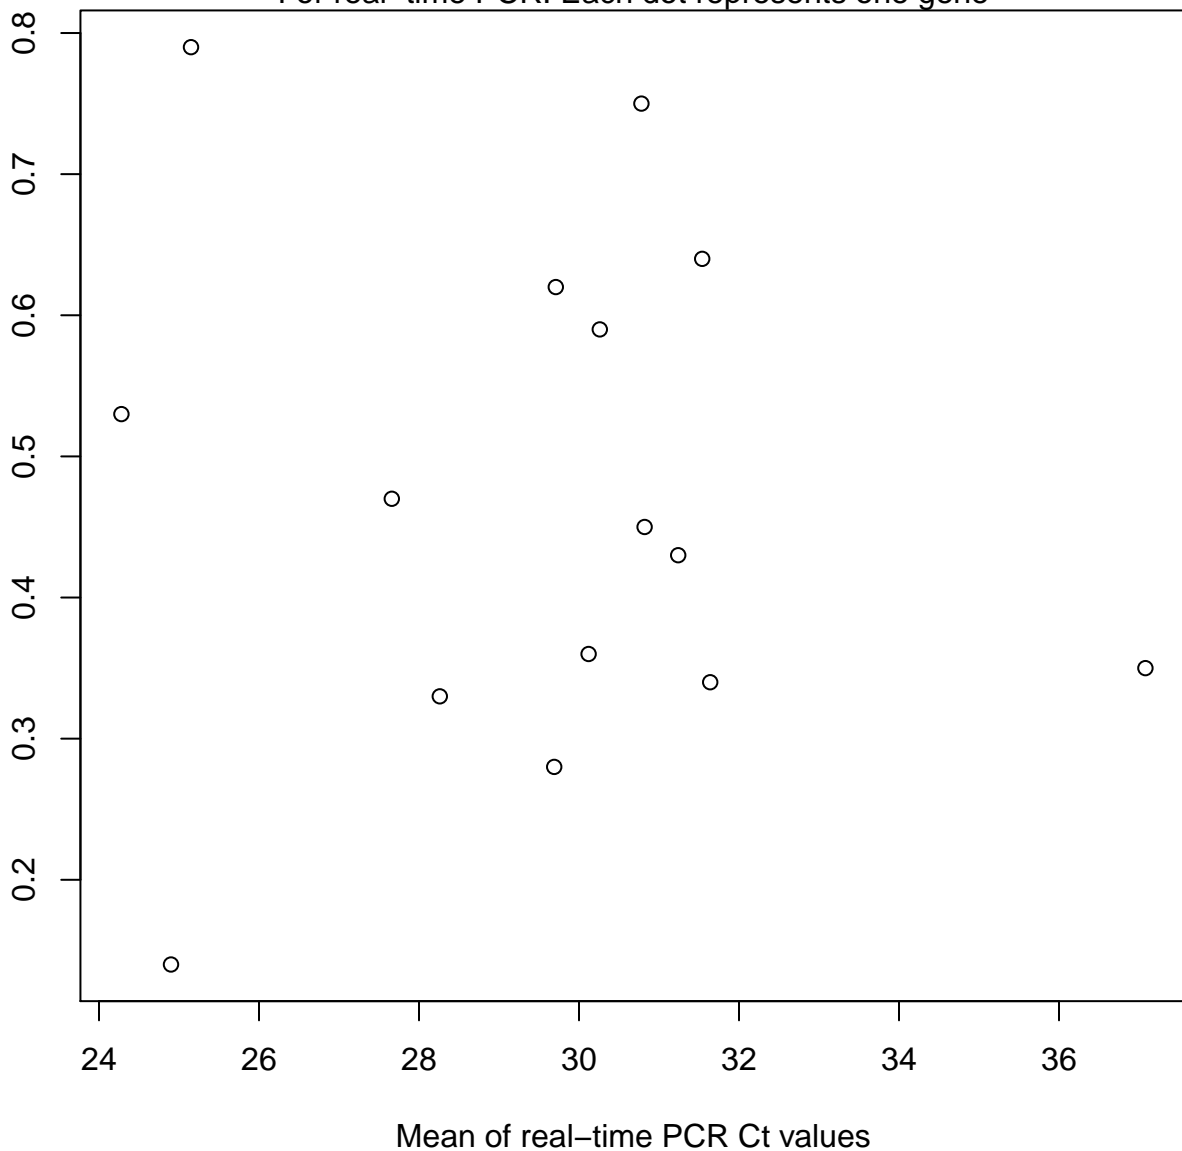

# Correlation between SD and No EC correlation metric

For microarray: Each dot represents one probeset

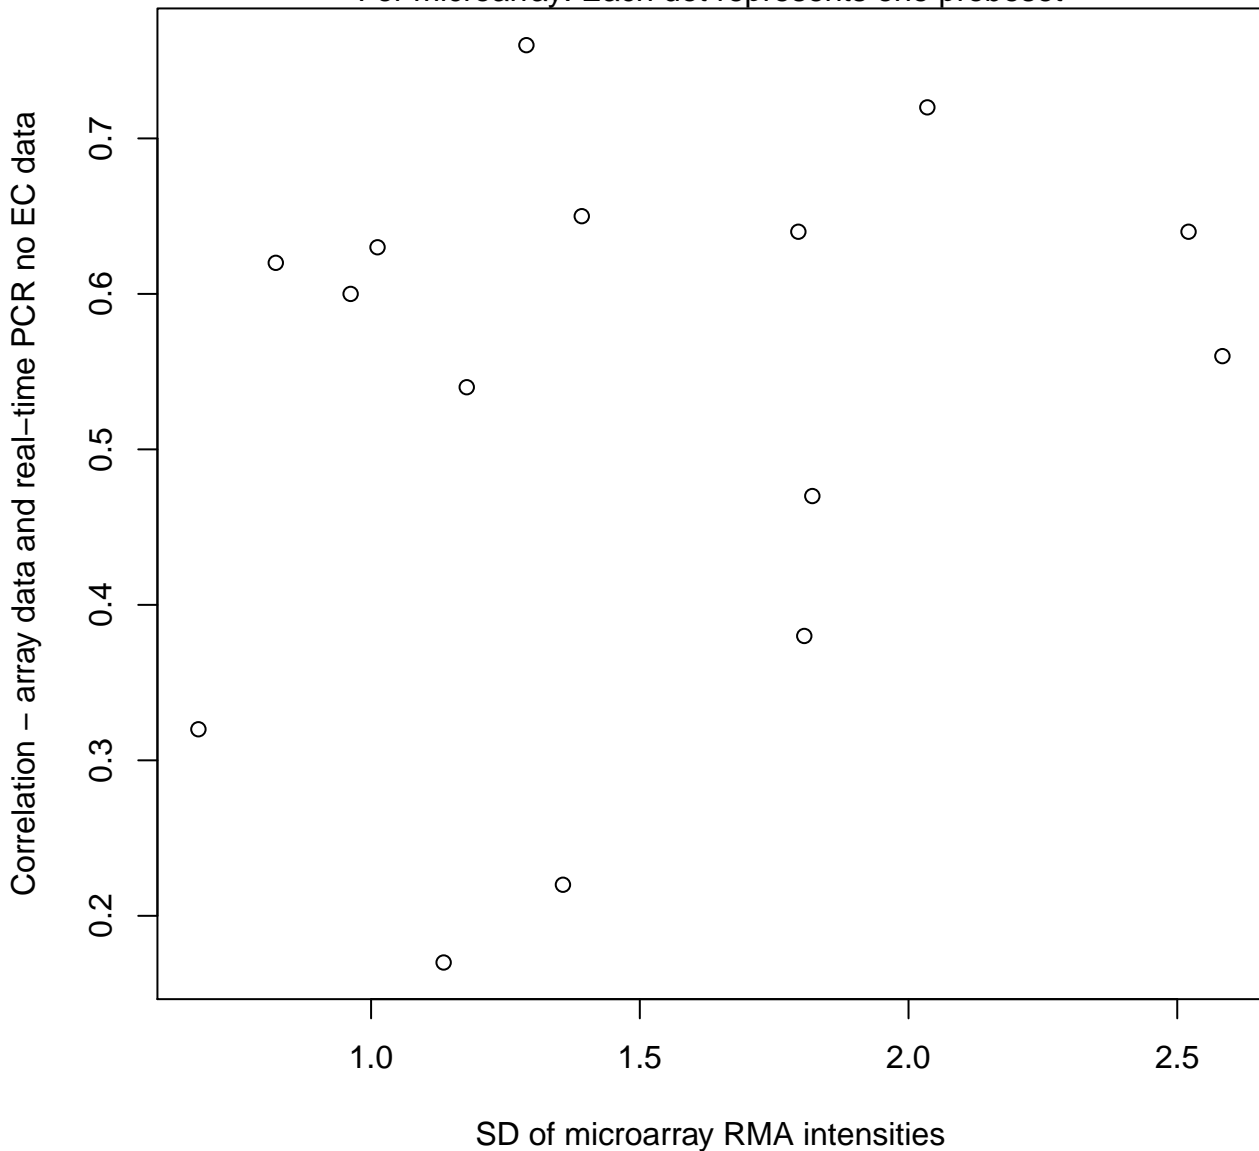

# Correlation between mean and No EC correlation metric

For microarray: Each dot represents one probeset

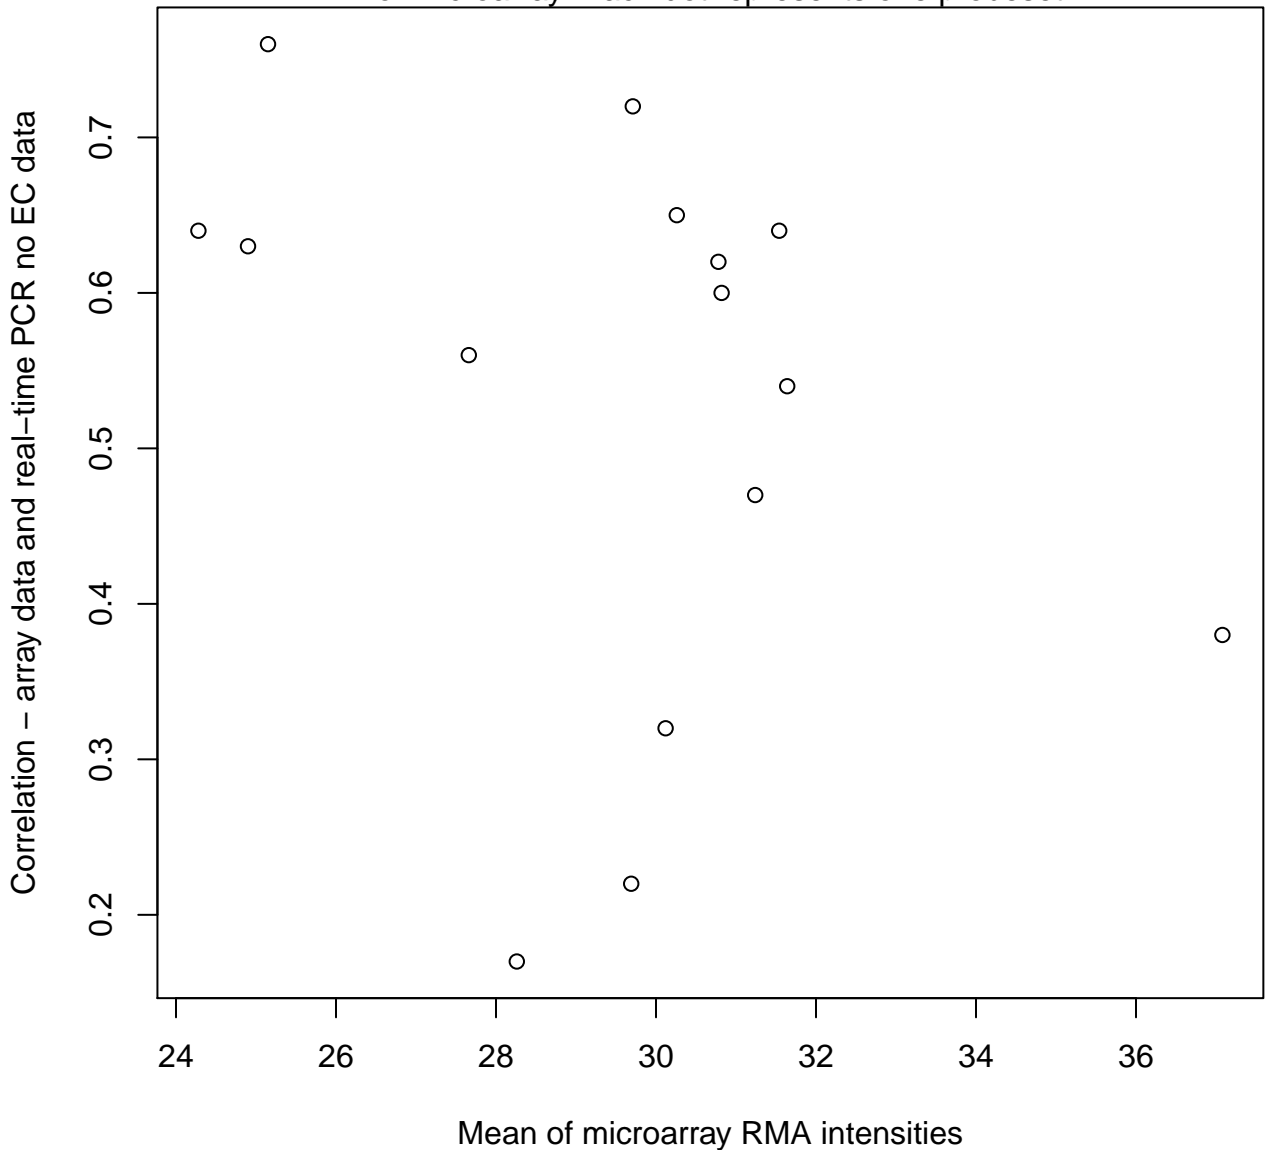

# Correlation between SD and PPIA\_RPLP0\_TBP correlation metric

For microarray: Each dot represents one probeset

Correlation – array data and real-time PCR PPIA\_RPLP0\_TBP normalized data

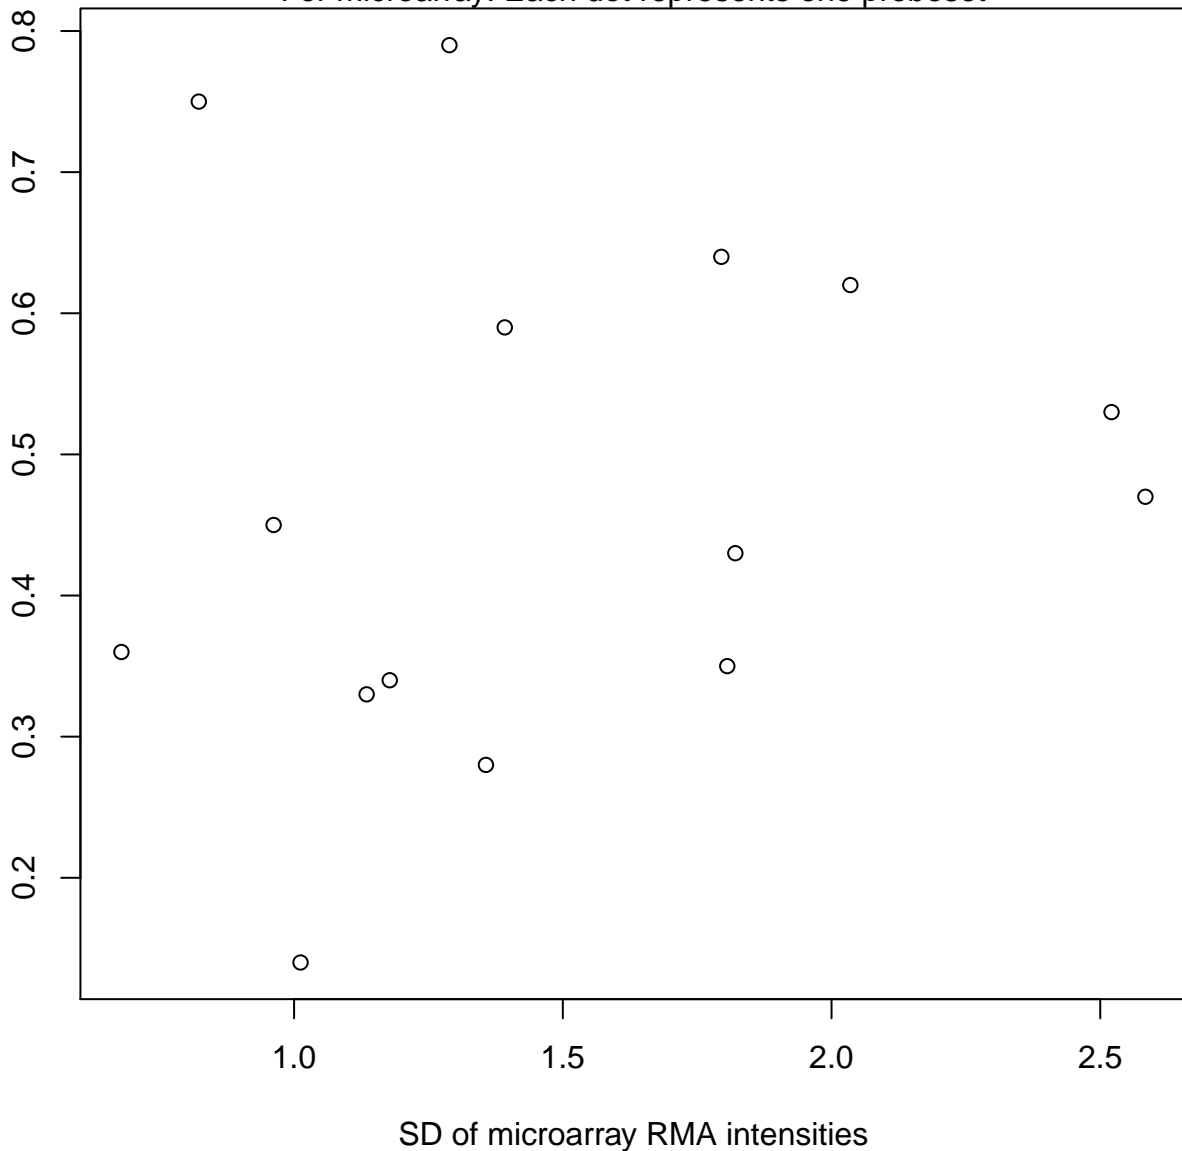

# Correlation between mean and PPIA\_RPLP0\_TBP correlation metric

For microarray: Each dot represents one probeset

Correlation - array data and real-time PCR PPIA\_RPLP0\_TBP normalized data

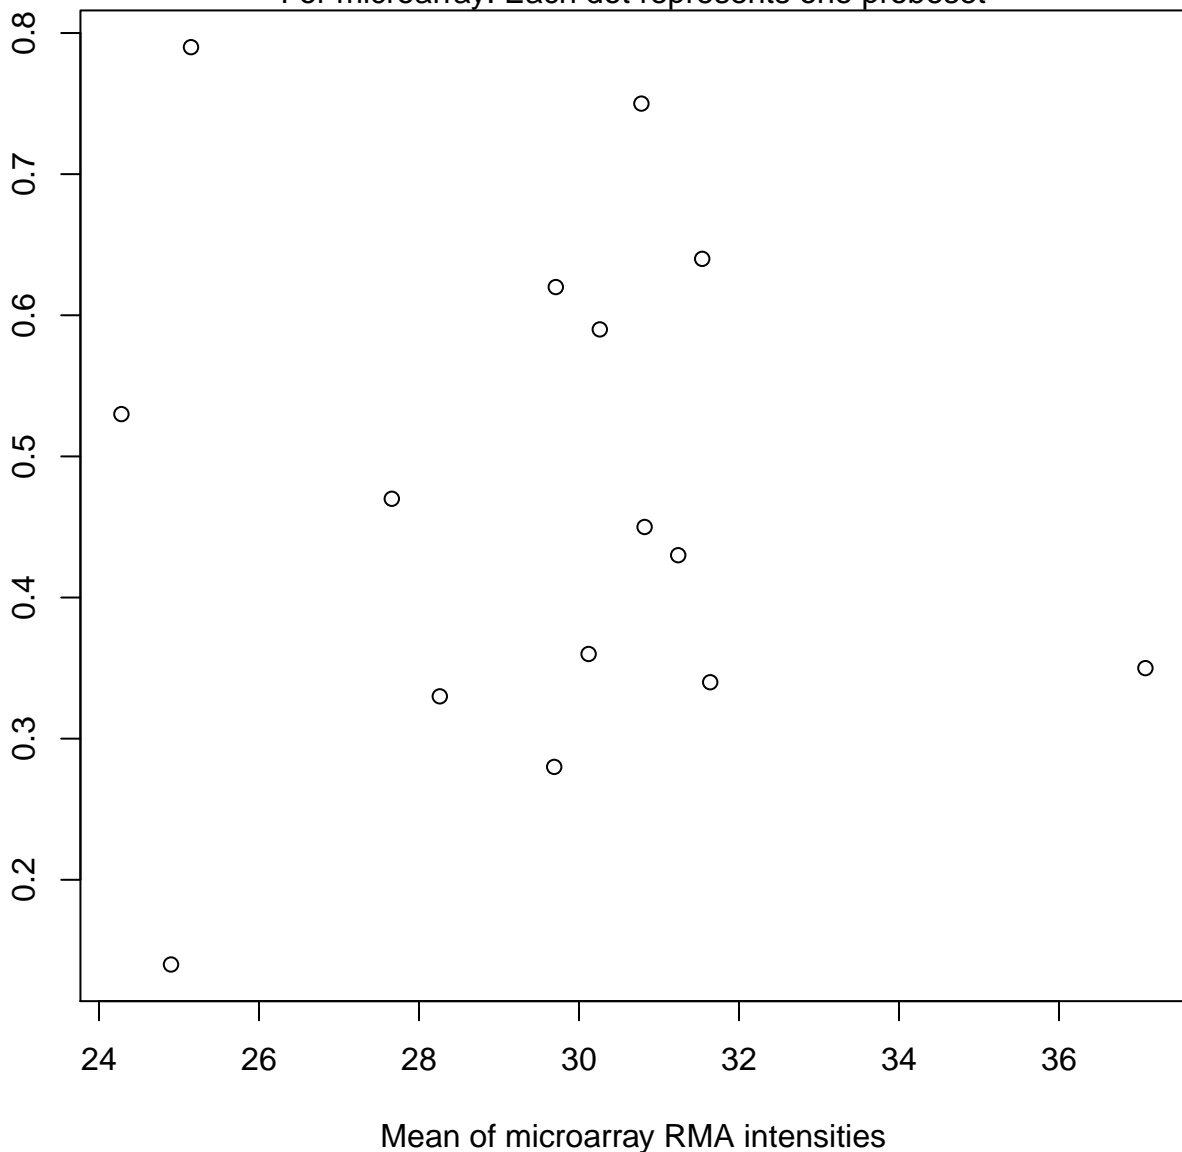

Supplement: 1471-2164-10-516-S2.pdf [file 1471-2164-10-516-S2.pdf]
