# Supplementary material for: Endogenous control genes in complex vascular tissue samples
Source: PubMed Central journal article supplement (PMC2779820; doi:10.1186/1471-2164-10-516), 2009-11-10
Supplement: 1471-2164-10-516-S4.pdf [file 1471-2164-10-516-S4.pdf]

# Correlation of array probes and taqman

>uc003iky.2 (EDNRA) length=4334  
Each dot represents a sample at the given location

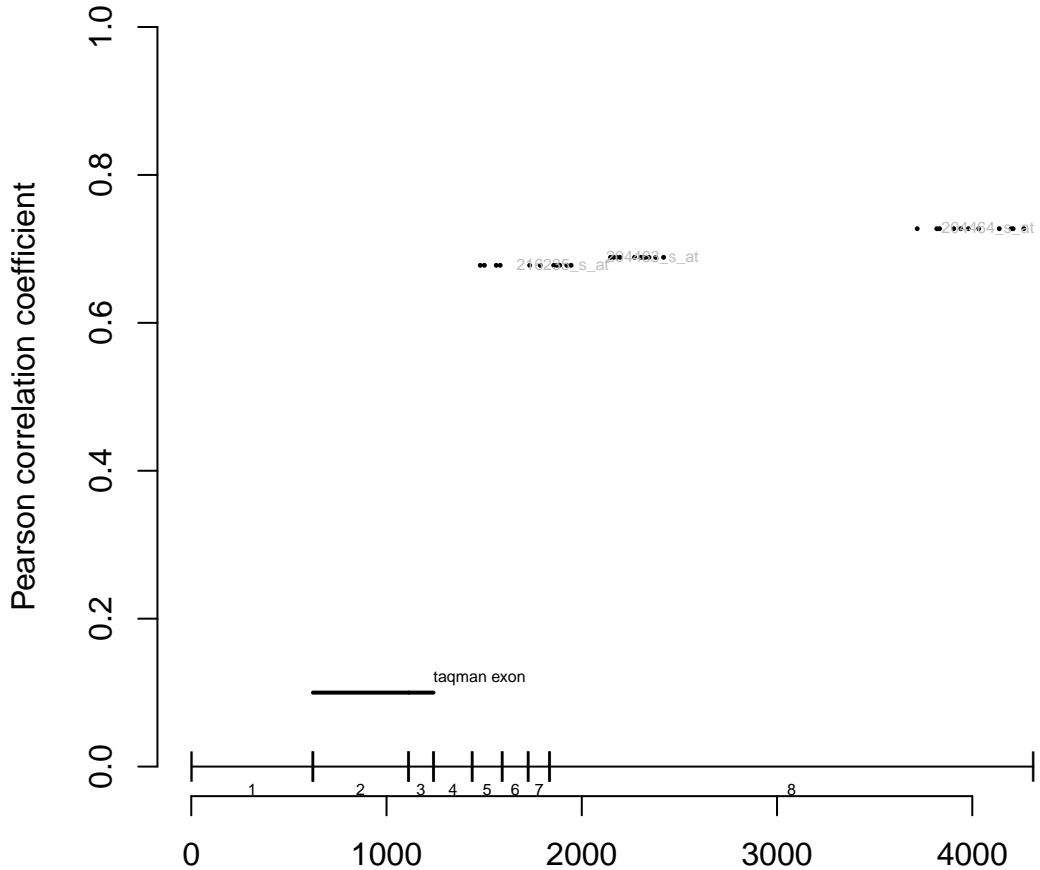

Found 3 probesets with correlation coefficient(s): 204463\_s\_at: 0.689 204464\_s\_at: 0.727 216235\_s\_at: 0.678

Found all probesets

Number of taqman replicate measurements with CV above threshold: 2

# Correlation of array probes and taqman

>uc003vvh.1 (TBXAS1) length=2246  
Each dot represents a sample at the given location

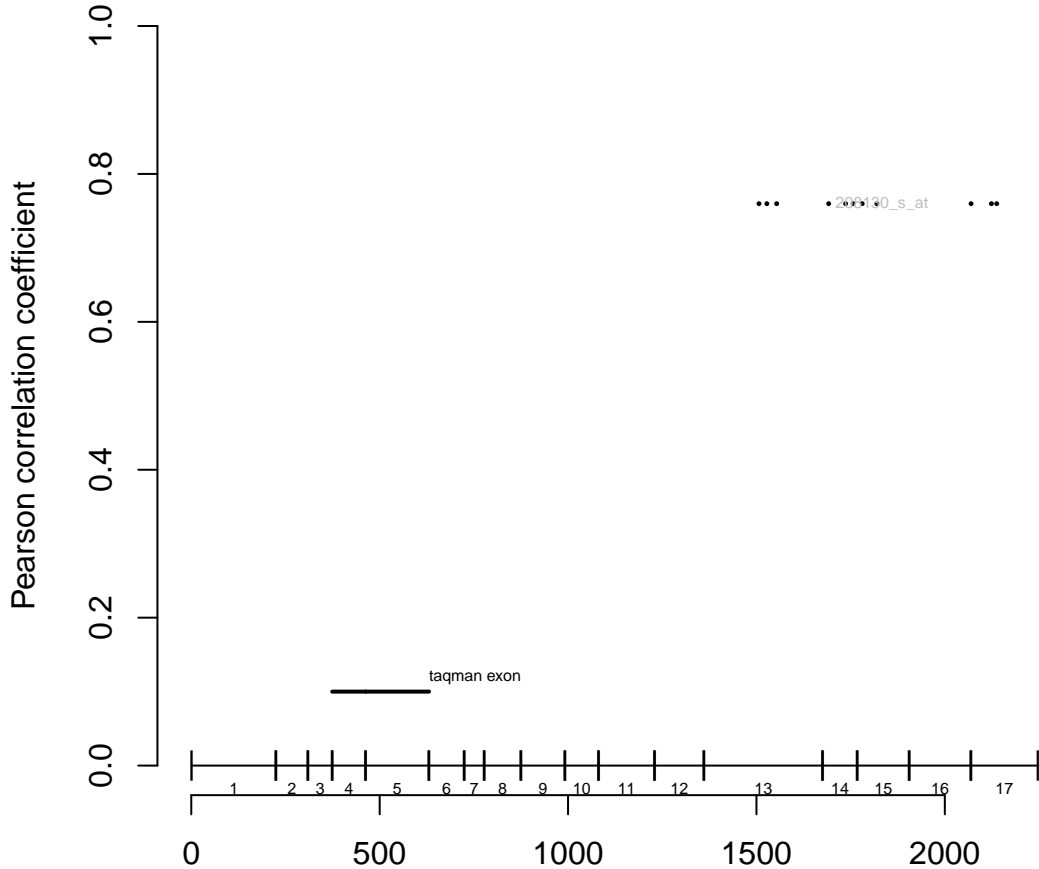

Found 1 probesets with correlation coefficient(s): 208130\_s\_at: 0.76  
1 probesets did not match in the given mRNA. They had correlation coefficient(s): 236345\_at: 0.565  
Number of taqman replicate measurements with CV above threshold: 8

# Correlation of array probes and taqman

>uc010cnp.1 (ALOX15B) length=3004  
Each dot represents a sample at the given location

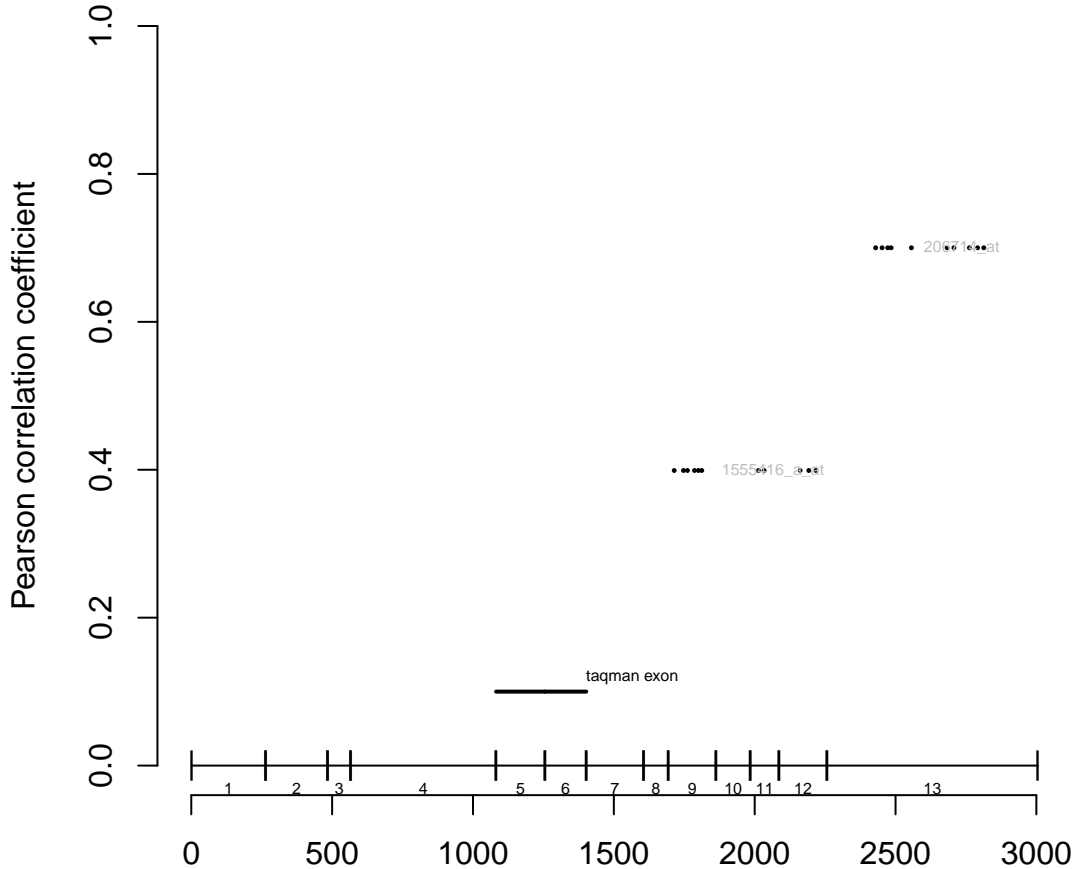

Found 2 probesets with correlation coefficient(s): 1555416\_a\_at: 0.399 206714\_at: 0.7

Found all probesets

Number of taqman replicate measurements with CV above threshold: 10

# Correlation of array probes and taqman

>uc003tnp.1 (IGFBP1) length=1660  
Each dot represents a sample at the given location

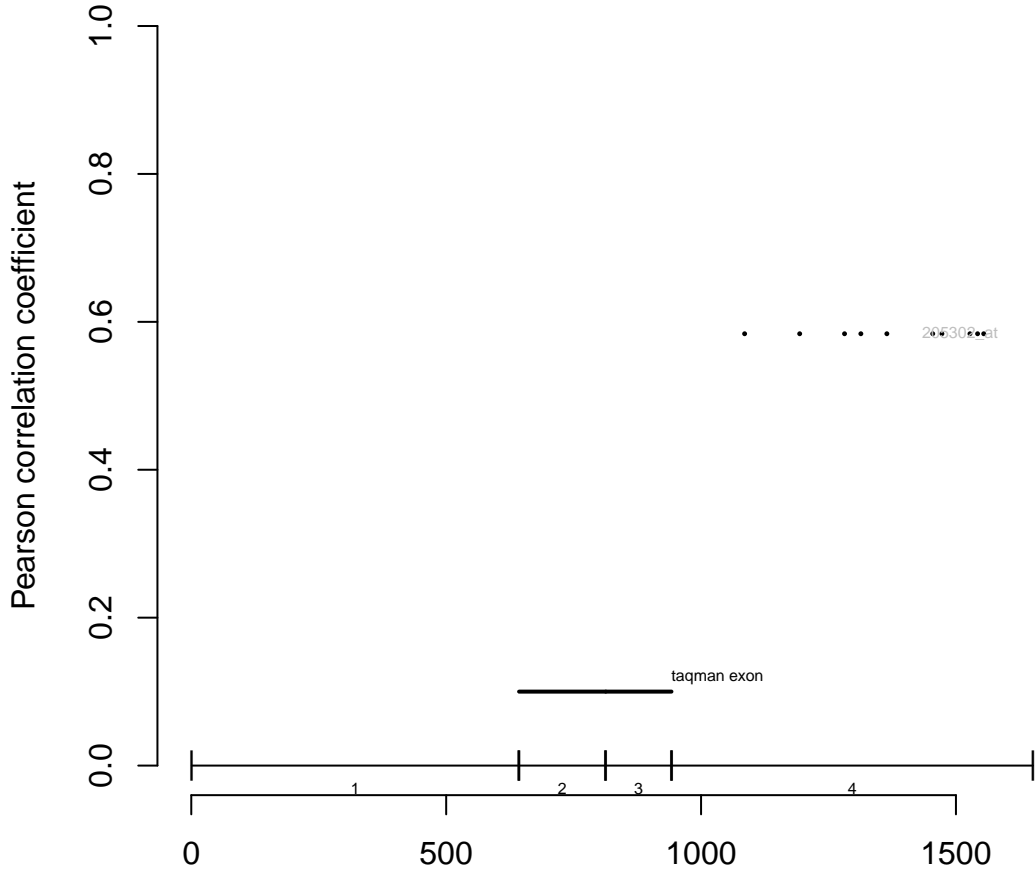

Found 1 probesets with correlation coefficient(s): 205302\_at: 0.584  
1 probesets did not match in the given mRNA. They had correlation coefficient(s): 237989\_at: -0.0393  
Number of taqman replicate measurements with CV above threshold: 7

# Correlation of array probes and taqman

>uc003uhf.2 (CD36) length=4727  
Each dot represents a sample at the given location

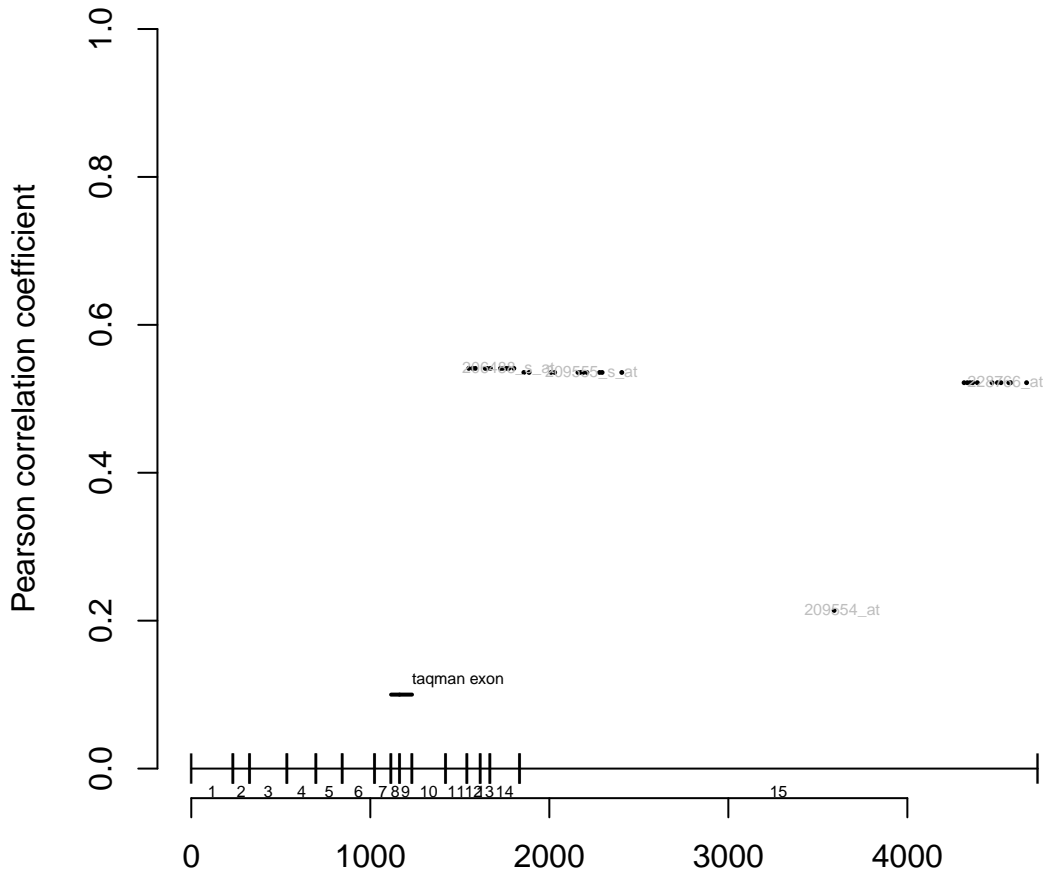

Found 4 probesets with correlation coefficient(s): 206488\_s\_at: 0.541 209554\_at: 0.214 209555\_s\_at: 0.536 228766\_at: 0.522

1 probesets did not match in the given mRNA. They had correlation coefficient(s): 242197\_x\_at: 0.617

Number of taqman replicate measurements with CV above threshold: 10

# Correlation of array probes and taqman

>uc010jcr.1 (LOX) length=1016 (NM\_002317)  
Each dot represents a sample at the given location

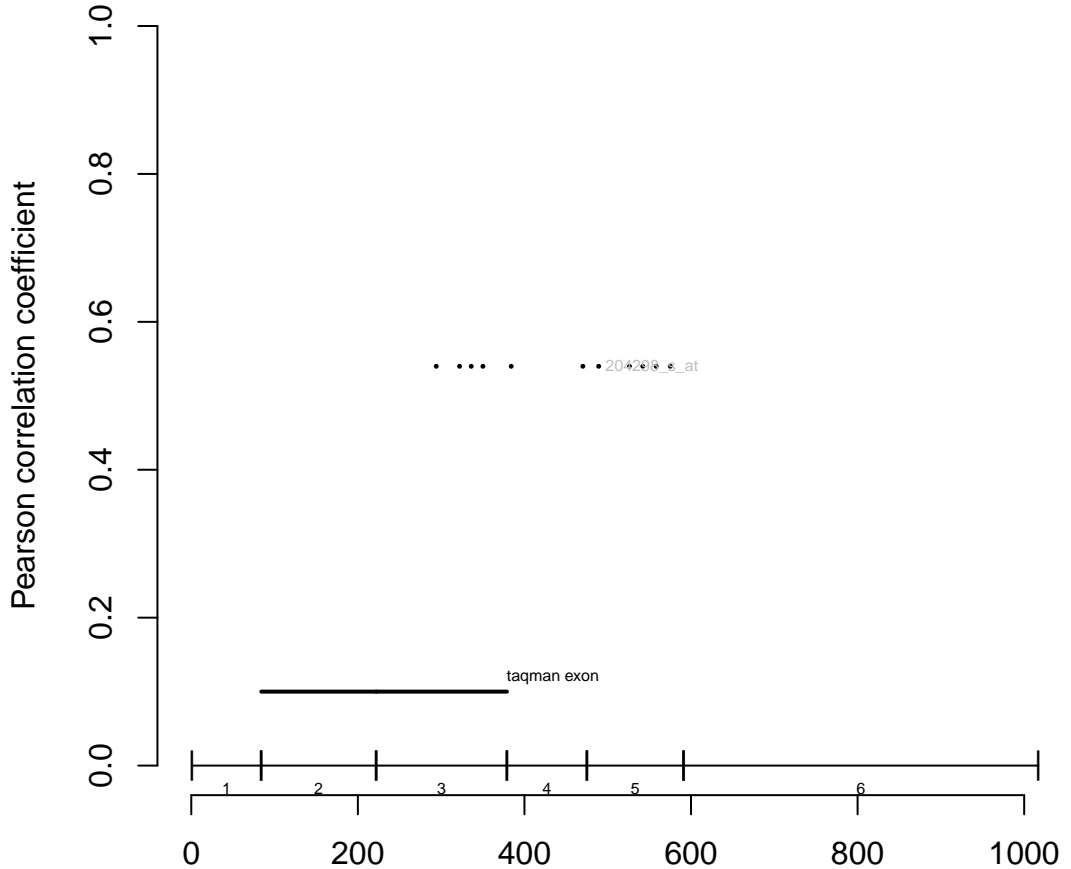

Found 1 probesets with correlation coefficient(s): 204298\_s\_at: 0.54

2 probesets did not match in the given mRNA. They had correlation coefficient(s): 213640\_s\_at: 0.369 215446\_s\_at: 0.641

Number of taqman replicate measurements with CV above threshold: 0

# Correlation of array probes and taqman

>uc003ycd.2 (FABP4) length=838  
Each dot represents a sample at the given location

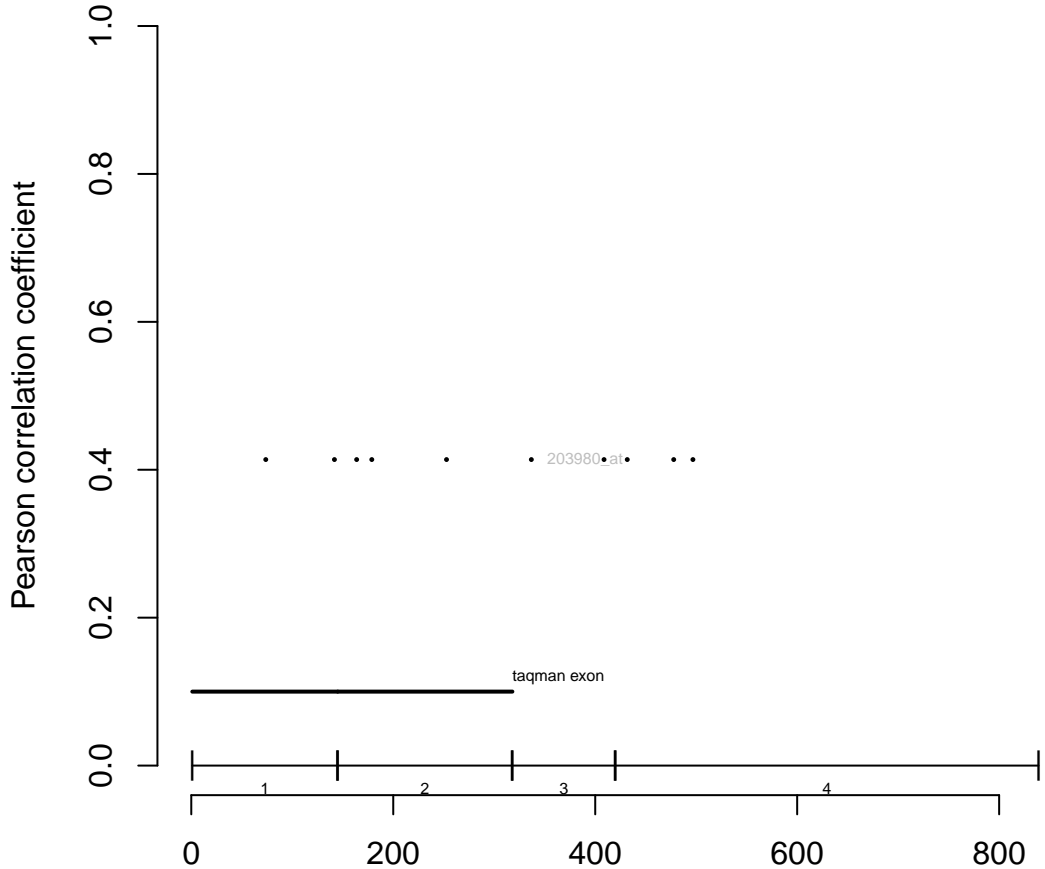

Found 1 probesets with correlation coefficient(s): 203980\_at: 0.414  
1 probesets did not match in the given mRNA. They had correlation coefficient(s): 235978\_at: 0.659  
Number of taqman replicate measurements with CV above threshold: 11

# Correlation of array probes and taqman

>uc002mfh.1 (TNFSF9 / CD137L) length=1645 (from NM\_003811, inclusive 3 x G in the middle but excl poly-A tail)  
Each dot represents a sample at the given location

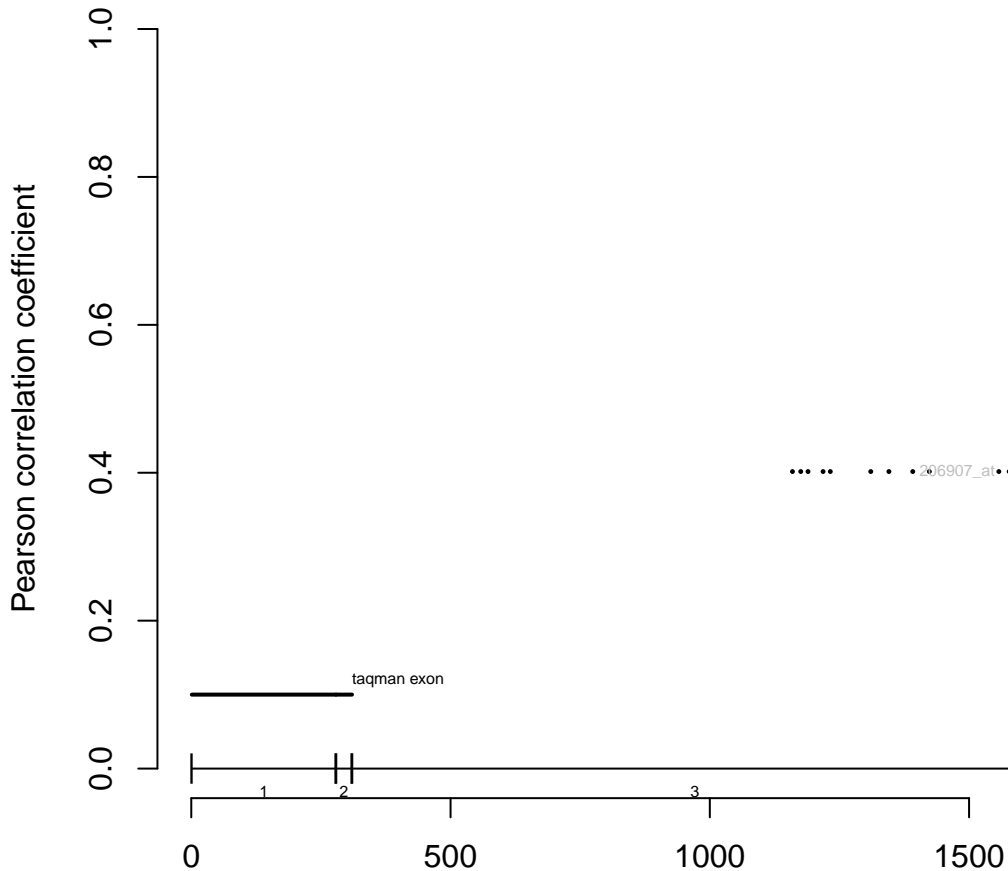

Found 1 probesets with correlation coefficient(s): 206907\_at: 0.402

Found all probesets

Number of taqman replicate measurements with CV above threshold: 5



# Correlation of array probes and taqman

>uc010bon.1 (IGF1R) length=11239  
Each dot represents a sample at the given location

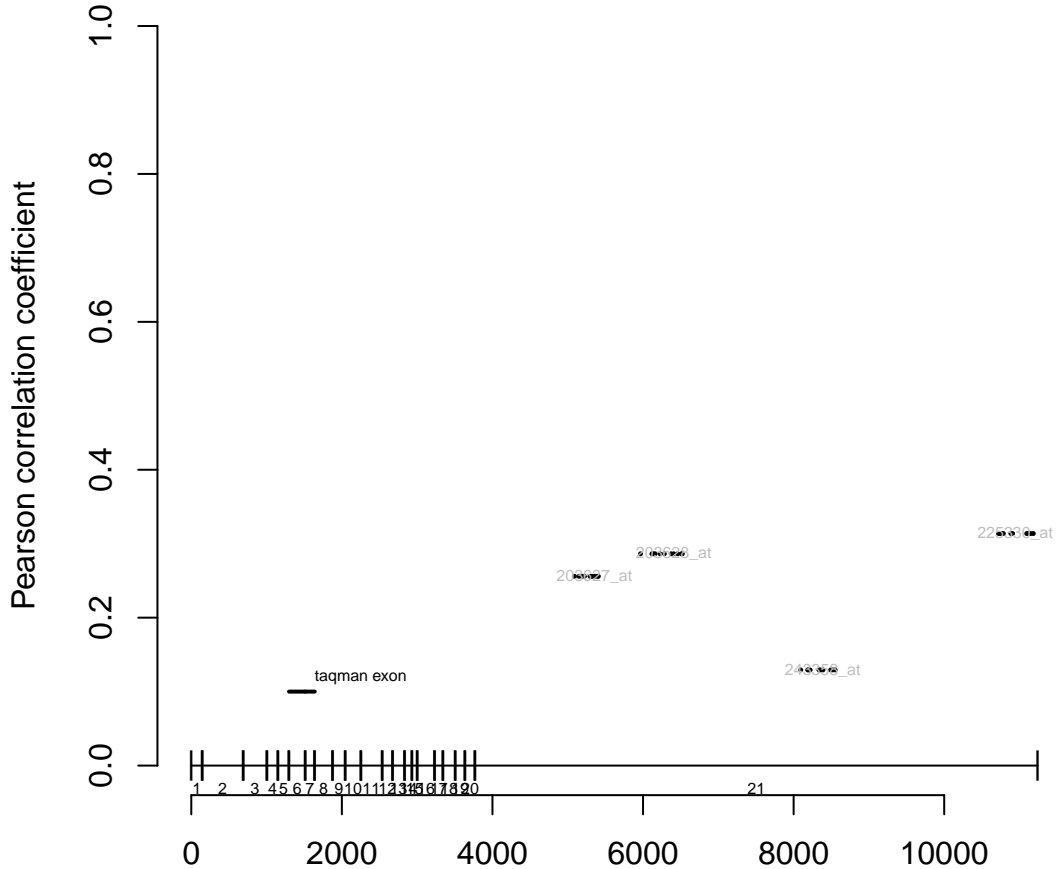

Found 4 probesets with correlation coefficient(s): 203627\_at: 0.256 203628\_at: 0.286 225330\_at: 0.314 243358\_at: 0.129

1 probesets did not match in the given mRNA. They had correlation coefficient(s): 208441\_at: -0.00669

Number of taqman replicate measurements with CV above threshold: 3

# Correlation of array probes and taqman

>uc001giw.1 (TNFSF4 / OX40L) length=3510 (NM\_003326)  
Each dot represents a sample at the given location

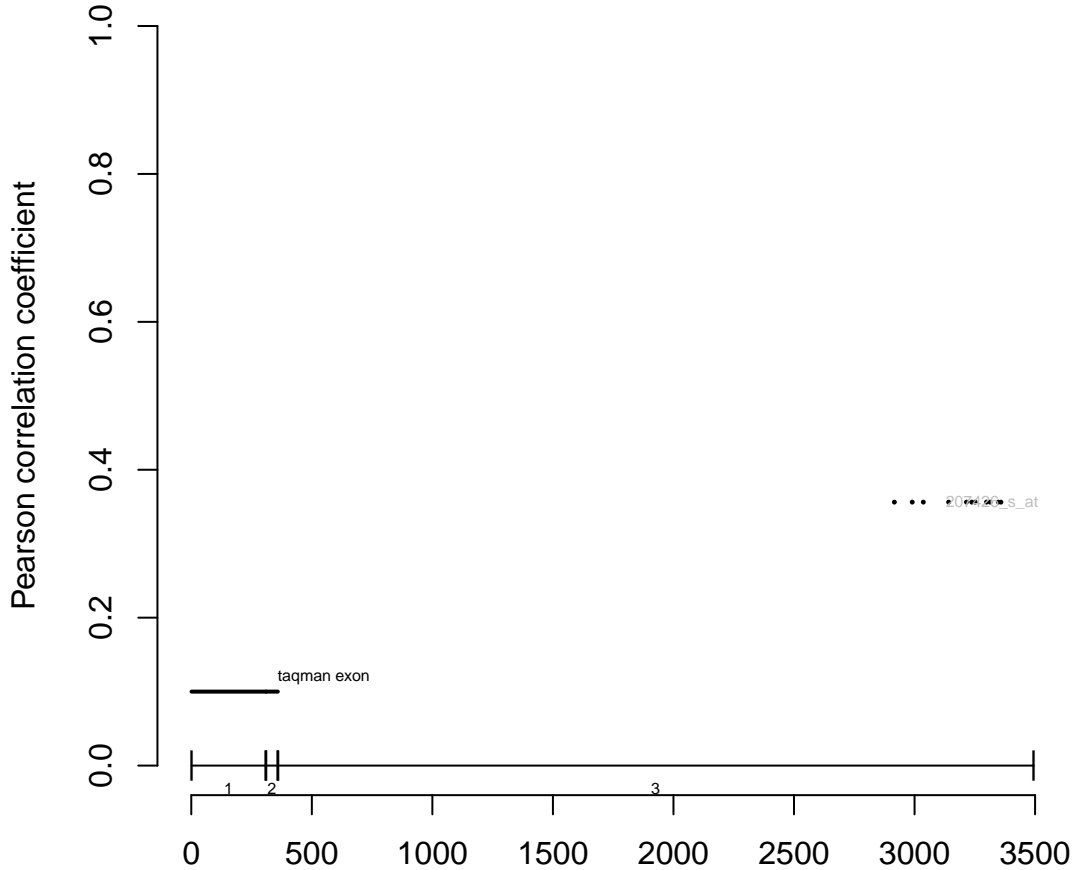

Found 1 probesets with correlation coefficient(s): 207426\_s\_at: 0.356

Found all probesets

Number of taqman replicate measurements with CV above threshold: 10

# Correlation of array probes and taqman

>uc001qjn.1 (ADIPOR2) length=3973 (NM\_024551)  
Each dot represents a sample at the given location

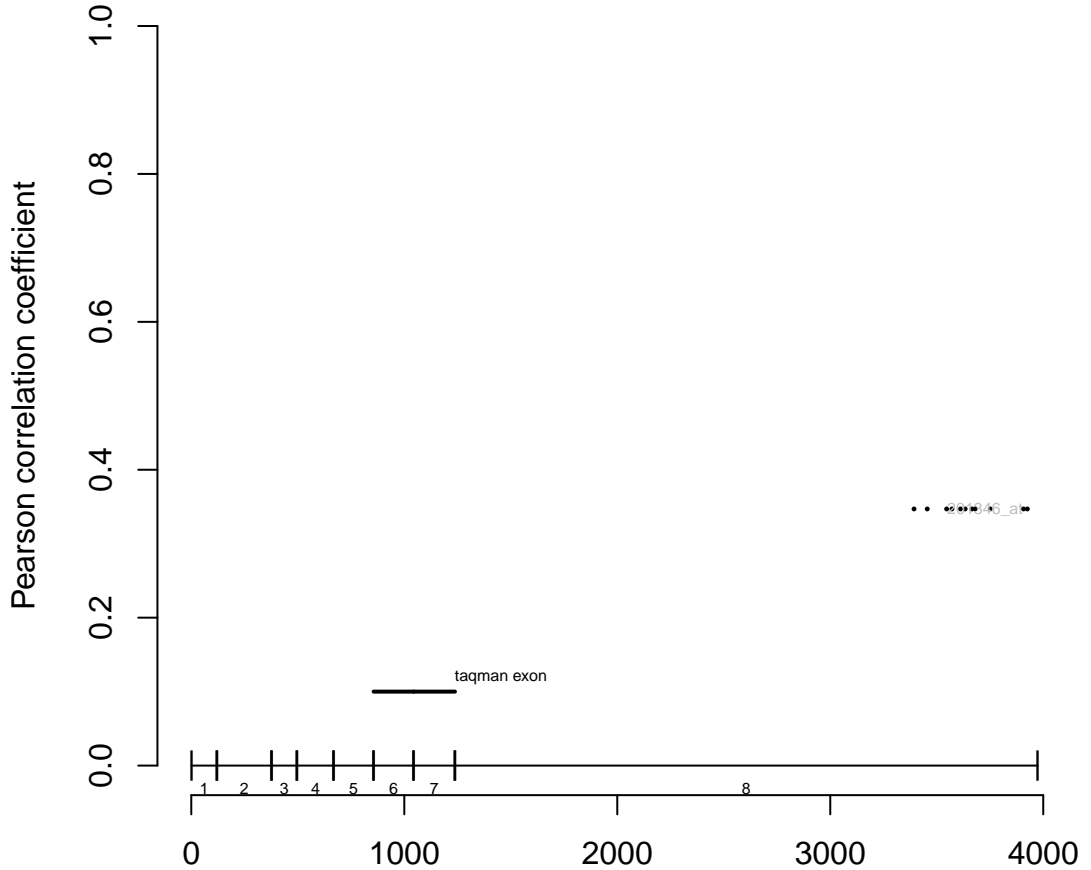

Found 1 probesets with correlation coefficient(s): 201346\_at: 0.347

Found all probesets

Number of taqman replicate measurements with CV above threshold: 4

# Correlation of array probes and taqman

>uc002gdx.2 (ALOX12) length=2358  
Each dot represents a sample at the given location

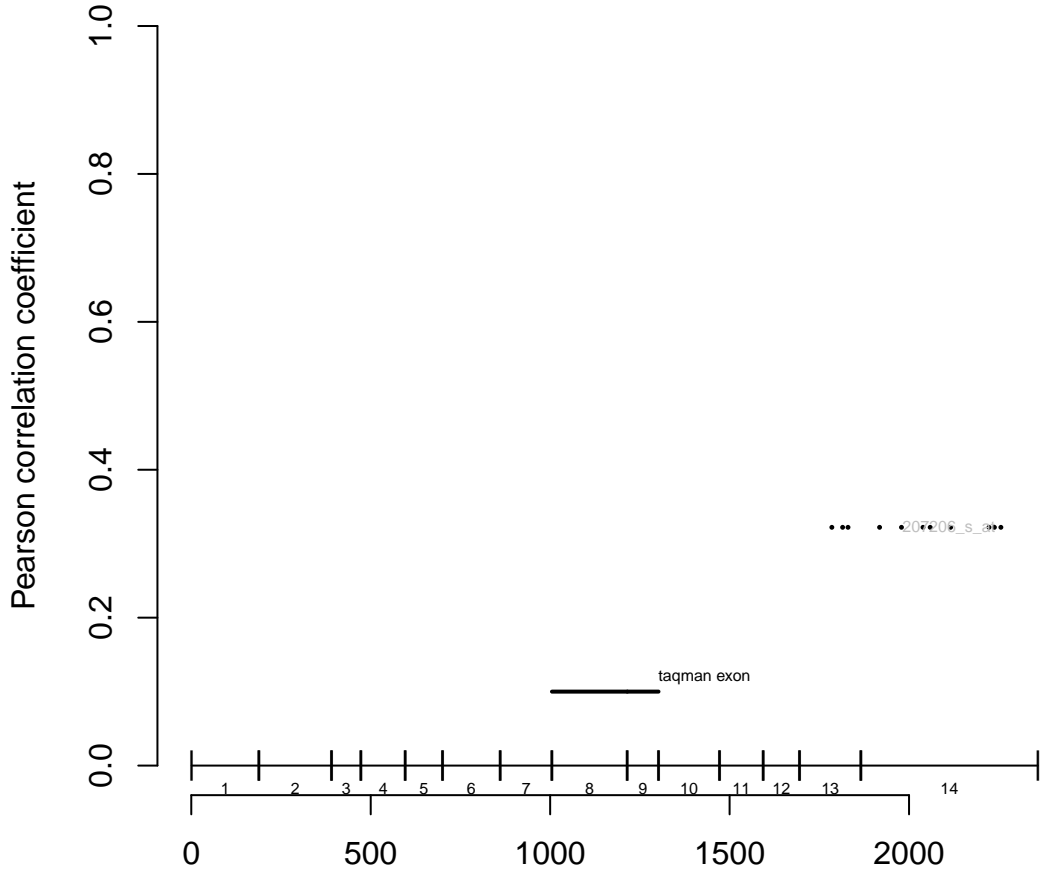

Found 1 probesets with correlation coefficient(s): 207206\_s\_at: 0.322

Found all probesets

Number of taqman replicate measurements with CV above threshold: 69

# Correlation of array probes and taqman

>uc001vkq.1 (EDNRB) length=4296  
Each dot represents a sample at the given location

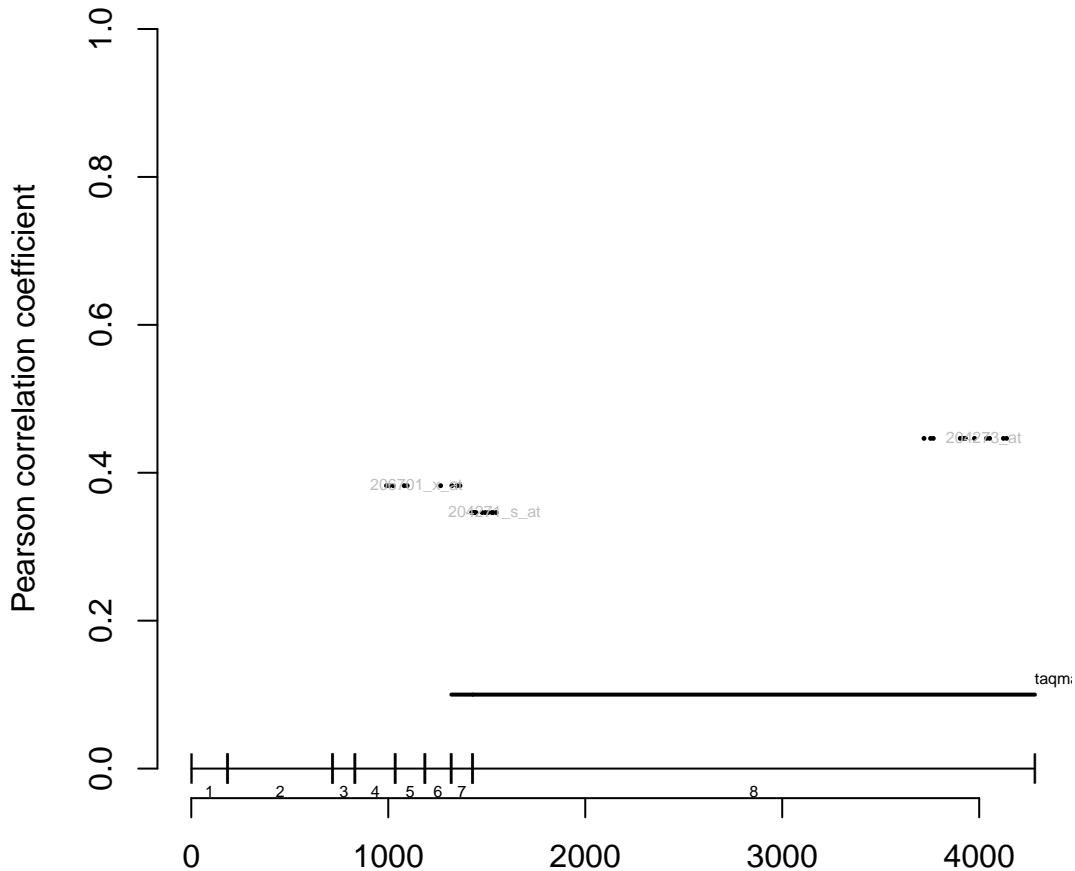

Found 3 probesets with correlation coefficient(s): 204271\_s\_at: 0.346 204273\_at: 0.447 206701\_x\_at: 0.383

Found all probesets

Number of taqman replicate measurements with CV above threshold: 4

# Correlation of array probes and taqman

>uc001tjn.2 (IGF1) length=7204  
Each dot represents a sample at the given location

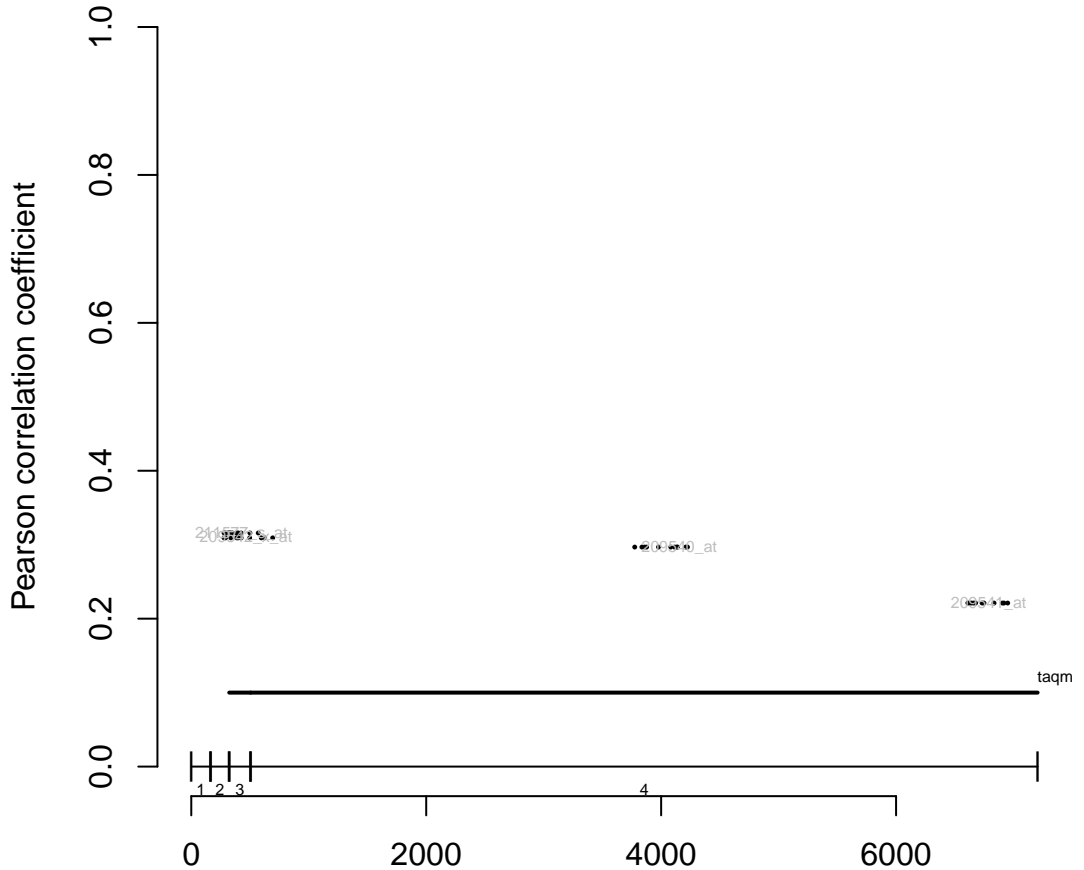

Found 4 probesets with correlation coefficient(s): 209540\_at: 0.297 209541\_at: 0.221 209542\_x\_at: 0.309 211577\_s\_at: 0.316  
Found all probesets

Number of taqman replicate measurements with CV above threshold: 3

# Correlation of array probes and taqman

>uc001gyq.2 (ADIPOR1) length=2151 (from NM\_015999)  
Each dot represents a sample at the given location

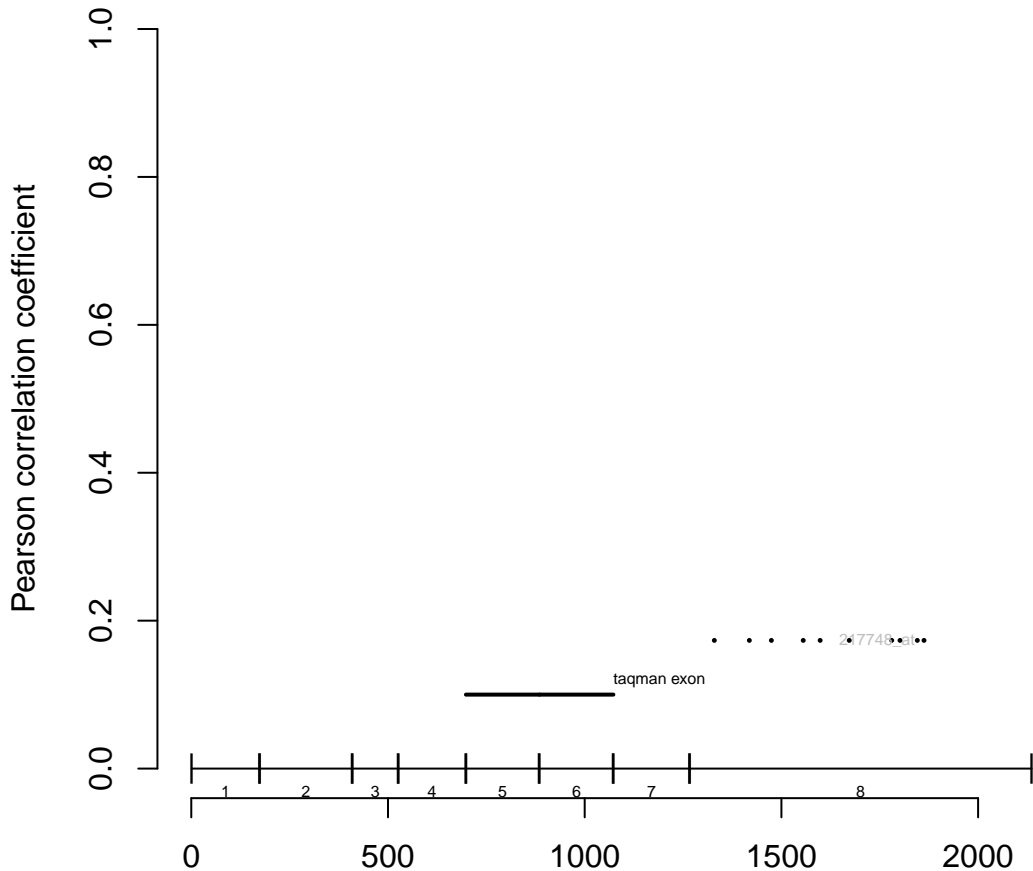

Found 1 probesets with correlation coefficient(s): 217748\_at: 0.173

Found all probesets

Number of taqman replicate measurements with CV above threshold: 4
