# Supplementary material for: Endogenous control genes in complex vascular tissue samples
Source: PubMed Central journal article supplement (PMC2779820; doi:10.1186/1471-2164-10-516), 2009-11-10
Supplement: 1471-2164-10-516-S5.pdf [file 1471-2164-10-516-S5.pdf]

# Correlation of array probes and taqman

>uc003iky.2 (EDNRA) length=4334

Each dot represents correlation to taqman of an array probe at the given location

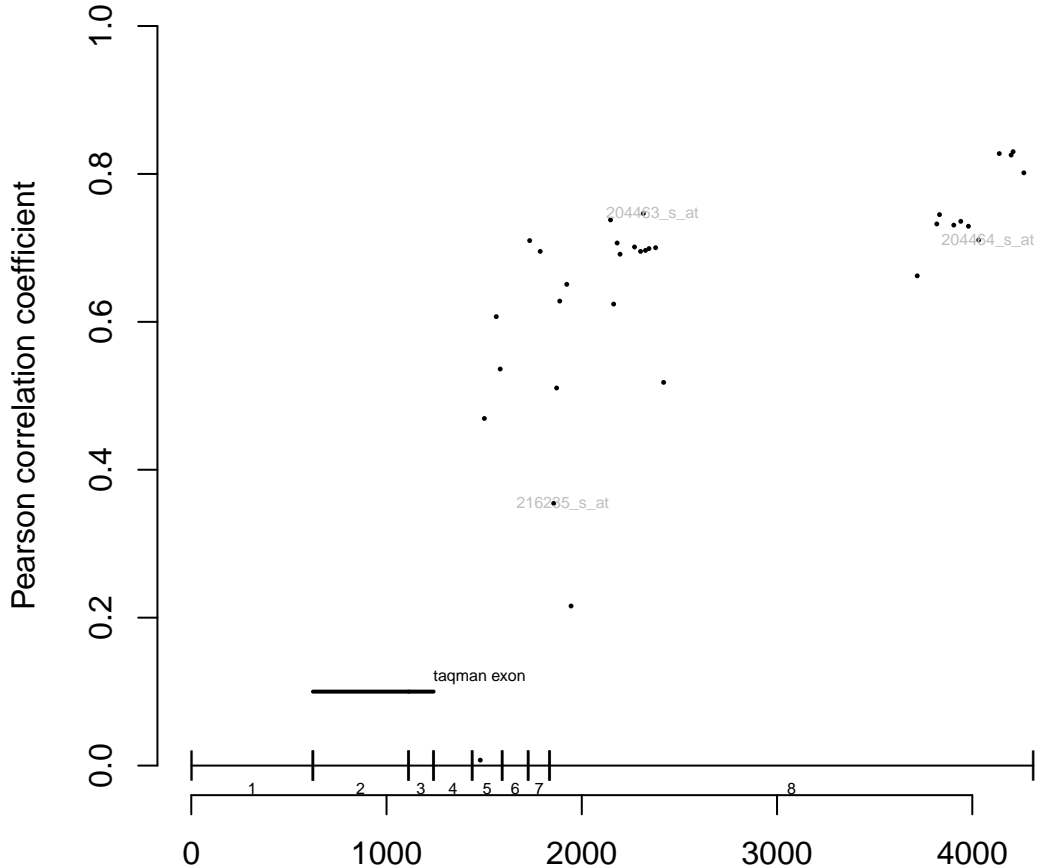

Found 3 probesets with mean correlation coefficient(s): 204463\_s\_at: 0.683 204464\_s\_at: 0.757 216235\_s\_at: 0.49

Found all probesets

Number of taqman replicate measurements with CV above threshold: 2

# Correlation of array probes and taqman

>uc003vvh.1 (TBXAS1) length=2246

Each dot represents correlation to taqman of an array probe at the given location

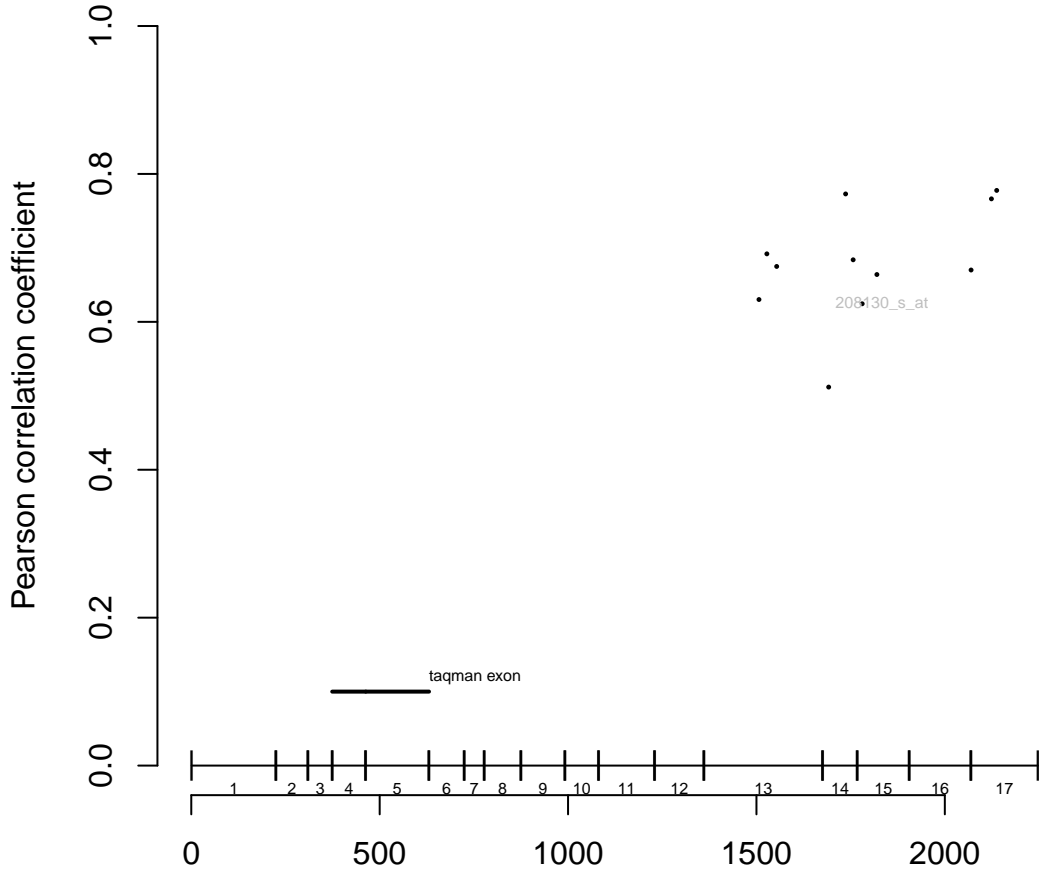

# Correlation of array probes and taqman

>uc010cnp.1 (ALOX15B) length=3004

Each dot represents correlation to taqman of an array probe at the given location

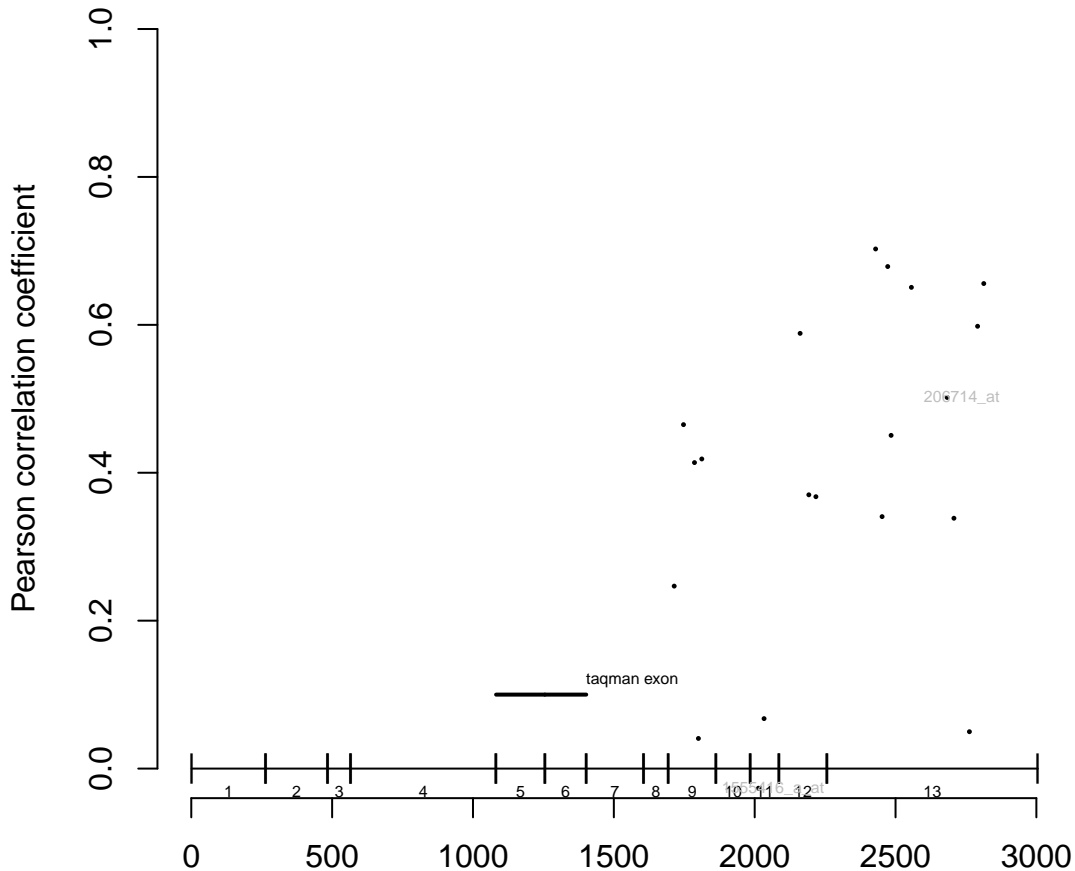

Found 2 probesets with mean correlation coefficient(s): 1555416\_a\_at: 0.235 206714\_at: 0.481

Found all probesets

Number of taqman replicate measurements with CV above threshold: 10

# Correlation of array probes and taqman

>uc003tnp.1 (IGFBP1) length=1660

Each dot represents correlation to taqman of an array probe at the given location

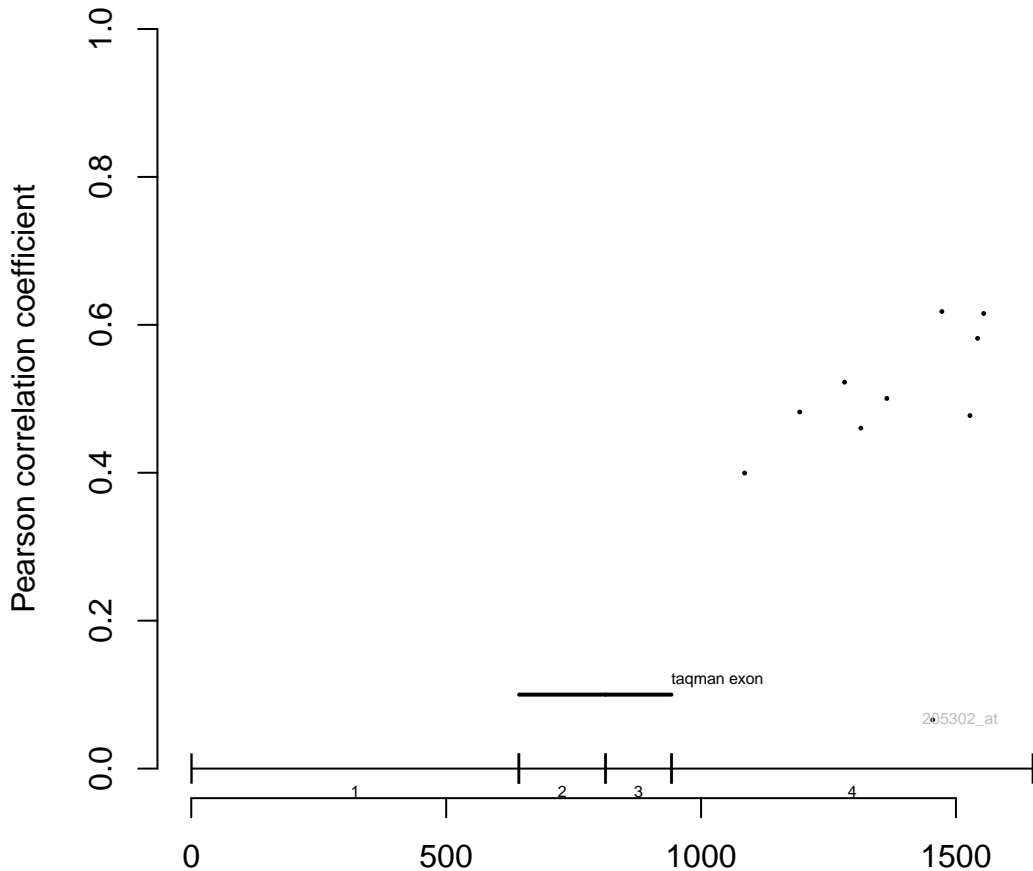

Found 1 probesets with mean correlation coefficient(s): 205302\_at: 0.426

1 probesets did not match in the given mRNA. They had mean correlation coefficient(s): 237989\_at: -0.00398

Number of taqman replicate measurements with CV above threshold: 7

# Correlation of array probes and taqman

>uc003uhf.2 (CD36) length=4727

Each dot represents correlation to taqman of an array probe at the given location

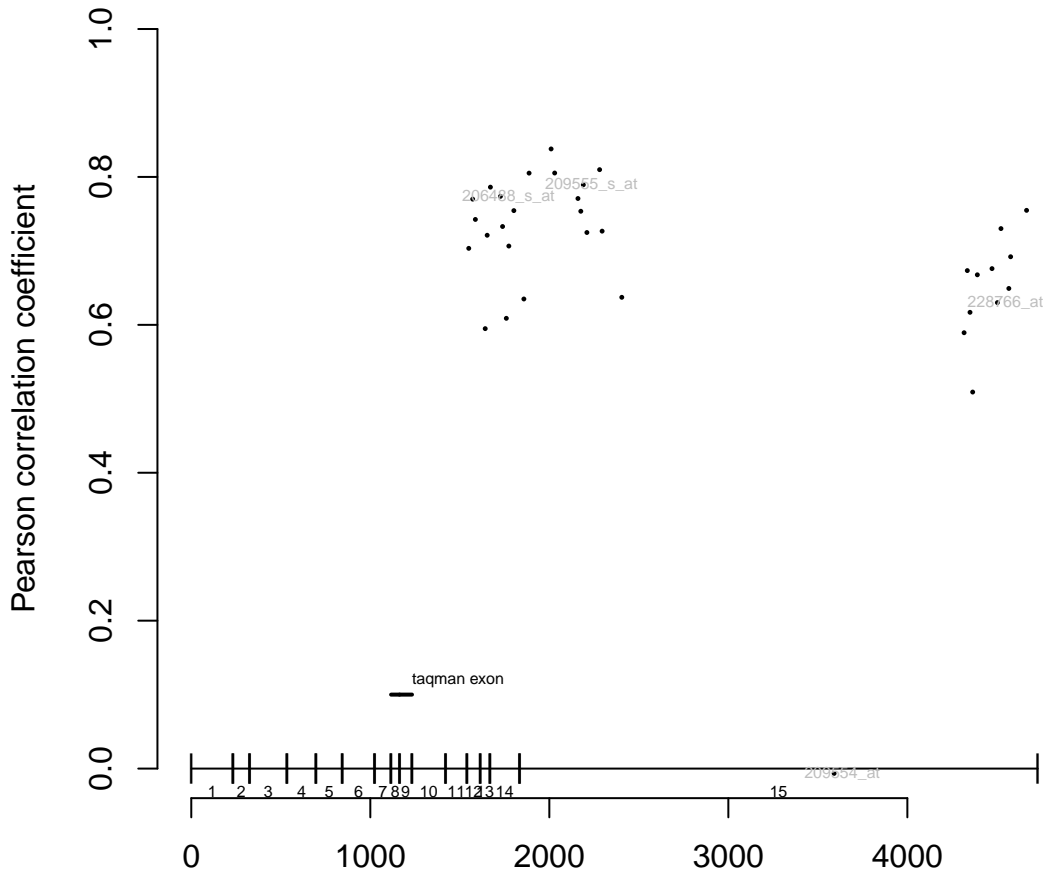

Found 4 probesets with mean correlation coefficient(s): 206488\_s\_at: 0.718 209554\_at: 0.122 209555\_s\_at: 0.754 228766\_at: 0.654

1 probesets did not match in the given mRNA. They had mean correlation coefficient(s): 242197\_x\_at: 0.575

Number of taqman replicate measurements with CV above threshold: 10

# Correlation of array probes and taqman

>uc010jcr.1 (LOX) length=1016 (NM\_002317)

Each dot represents correlation to taqman of an array probe at the given location

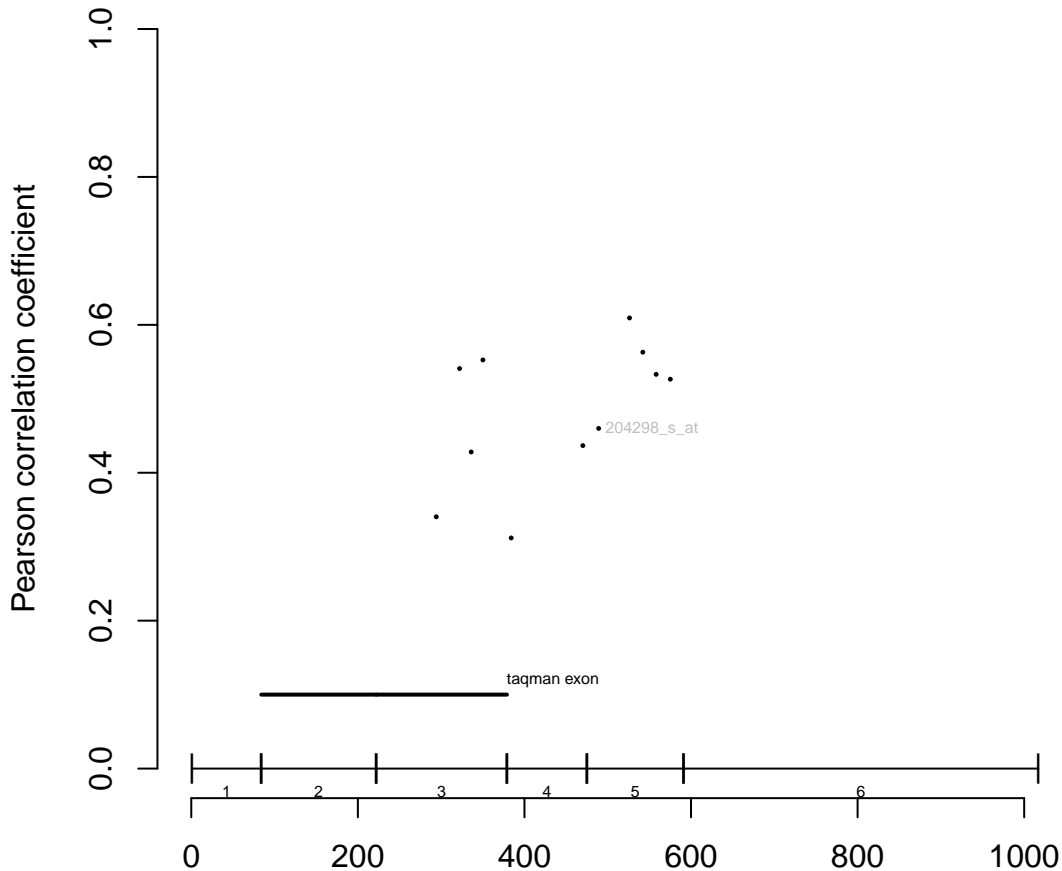

Found 1 probesets with mean correlation coefficient(s): 204298\_s\_at: 0.482

2 probesets did not match in the given mRNA. They had mean correlation coefficient(s): 213640\_s\_at: 0.169 215446\_s\_at: 0.624

Number of taqman replicate measurements with CV above threshold: 0

# Correlation of array probes and taqman

>uc003ycd.2 (FABP4) length=838

Each dot represents correlation to taqman of an array probe at the given location

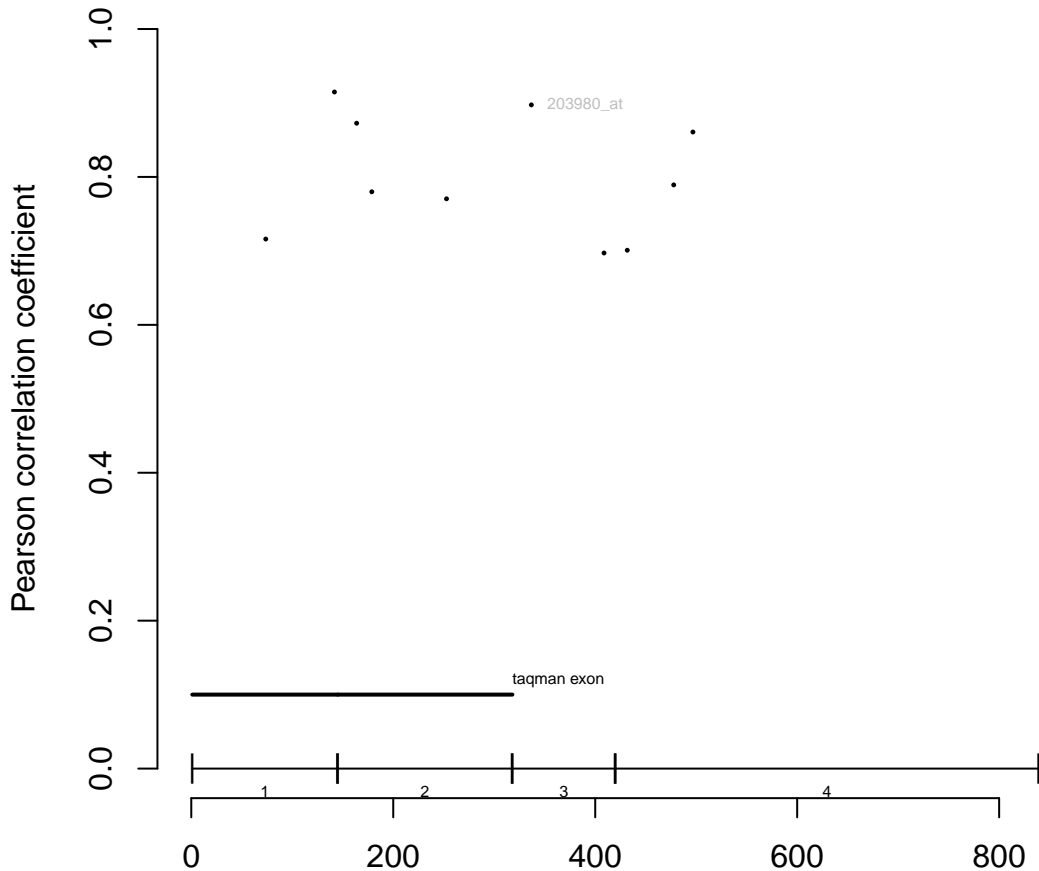

Found 1 probesets with mean correlation coefficient(s): 203980\_at: 0.791

1 probesets did not match in the given mRNA. They had mean correlation coefficient(s): 235978\_at: 0.72

Number of taqman replicate measurements with CV above threshold: 11

# Correlation of array probes and taqman

>uc002mfh.1 (TNFSF9 / CD137L) length=1645 (from NM\_003811, inclusive 3 x G in the middle but excl poly-A tail)  
Each dot represents correlation to taqman of an array probe at the given location

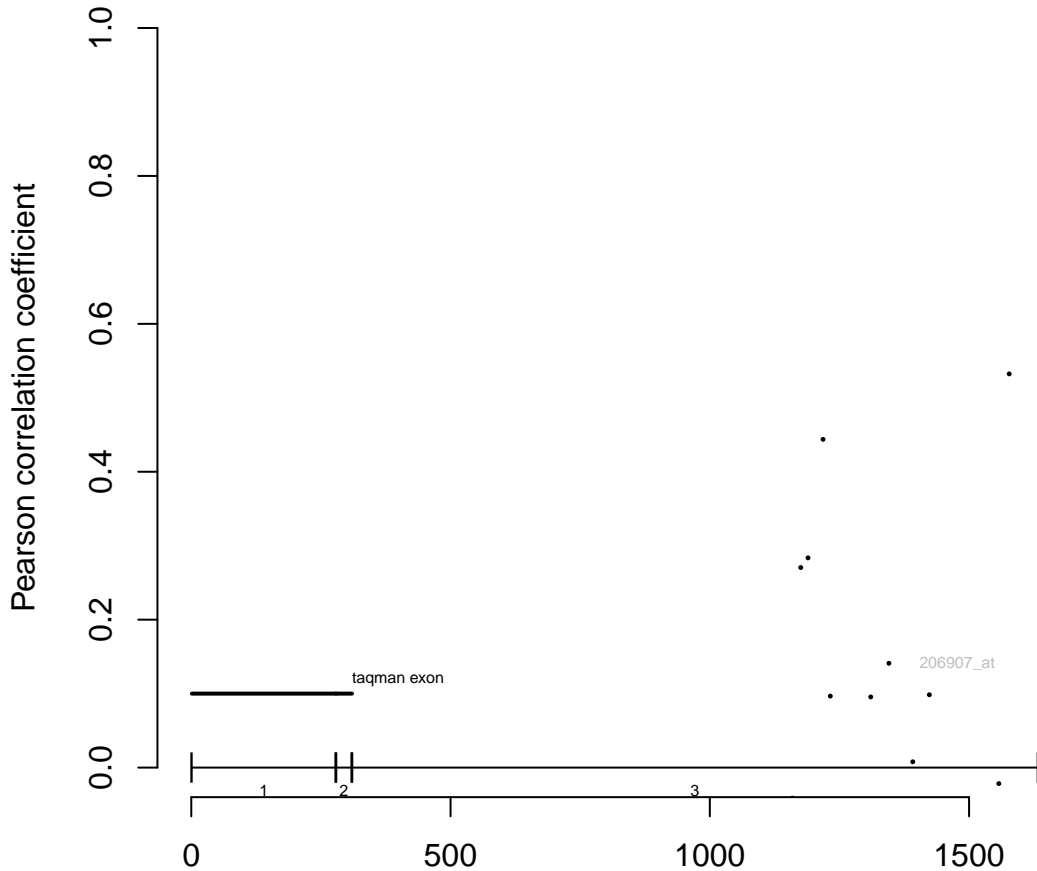

Found 1 probesets with mean correlation coefficient(s): 206907\_at: 0.173

Found all probesets

Number of taqman replicate measurements with CV above threshold: 5



# Correlation of array probes and taqman

>uc010bon.1 (IGF1R) length=11239

Each dot represents correlation to taqman of an array probe at the given location

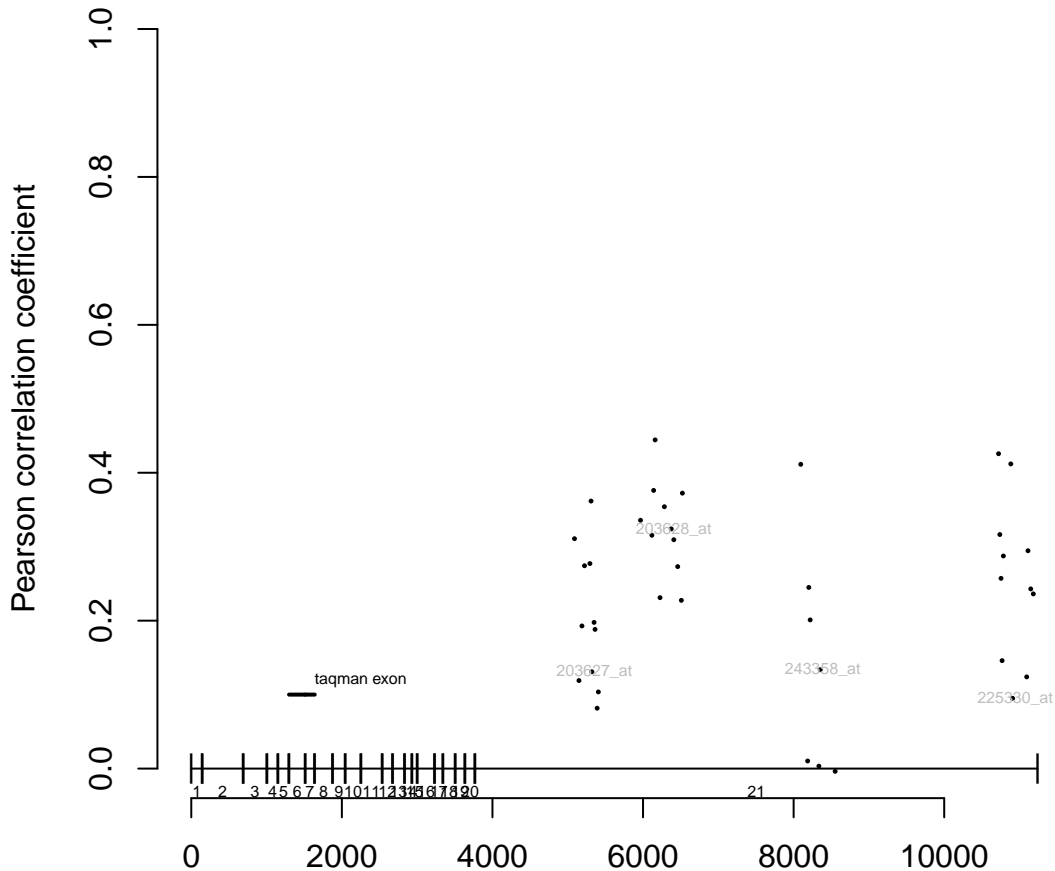

Found 4 probesets with mean correlation coefficient(s): 203627\_at: 0.203 203628\_at: 0.324 225330\_at: 0.258 243358\_at: 0.0663

1 probesets did not match in the given mRNA. They had mean correlation coefficient(s): 208441\_at: 0.0248

Number of taqman replicate measurements with CV above threshold: 3

# Correlation of array probes and taqman

>uc001giw.1 (TNFSF4 / OX40L) length=3510 (NM\_003326)

Each dot represents correlation to taqman of an array probe at the given location

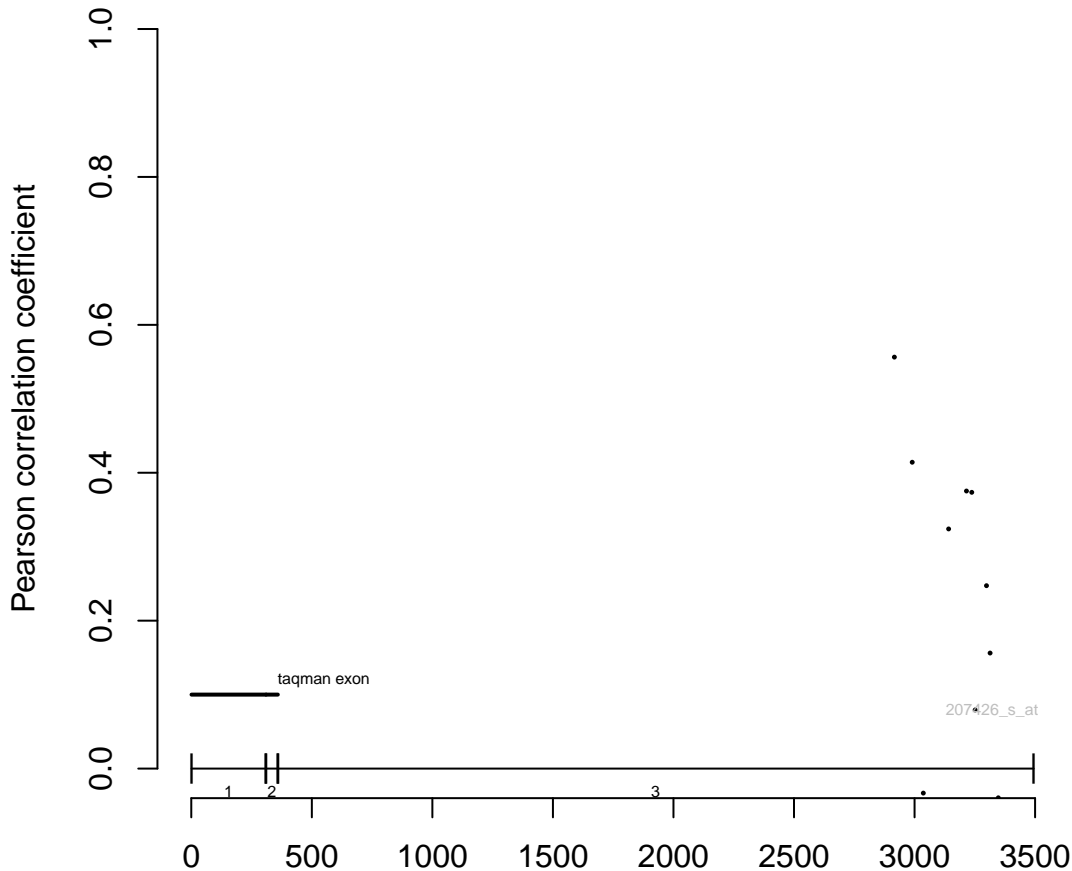

Found 1 probesets with mean correlation coefficient(s): 207426\_s\_at: 0.196

Found all probesets

Number of taqman replicate measurements with CV above threshold: 10

# Correlation of array probes and taqman

>uc001qjn.1 (ADIPOR2) length=3973 (NM\_024551)

Each dot represents correlation to taqman of an array probe at the given location

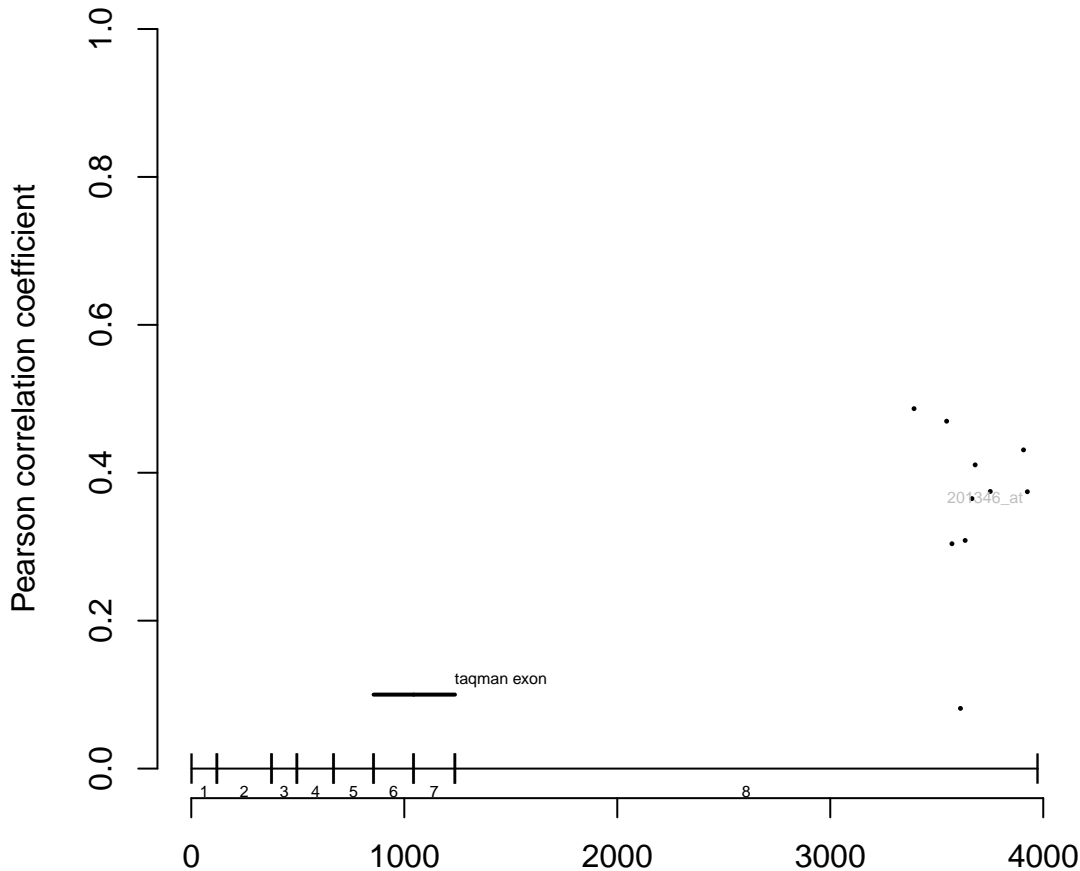

Found 1 probesets with mean correlation coefficient(s): 201346\_at: 0.318

Found all probesets

Number of taqman replicate measurements with CV above threshold: 4

# Correlation of array probes and taqman

>uc002gdx.2 (ALOX12) length=2358

Each dot represents correlation to taqman of an array probe at the given location

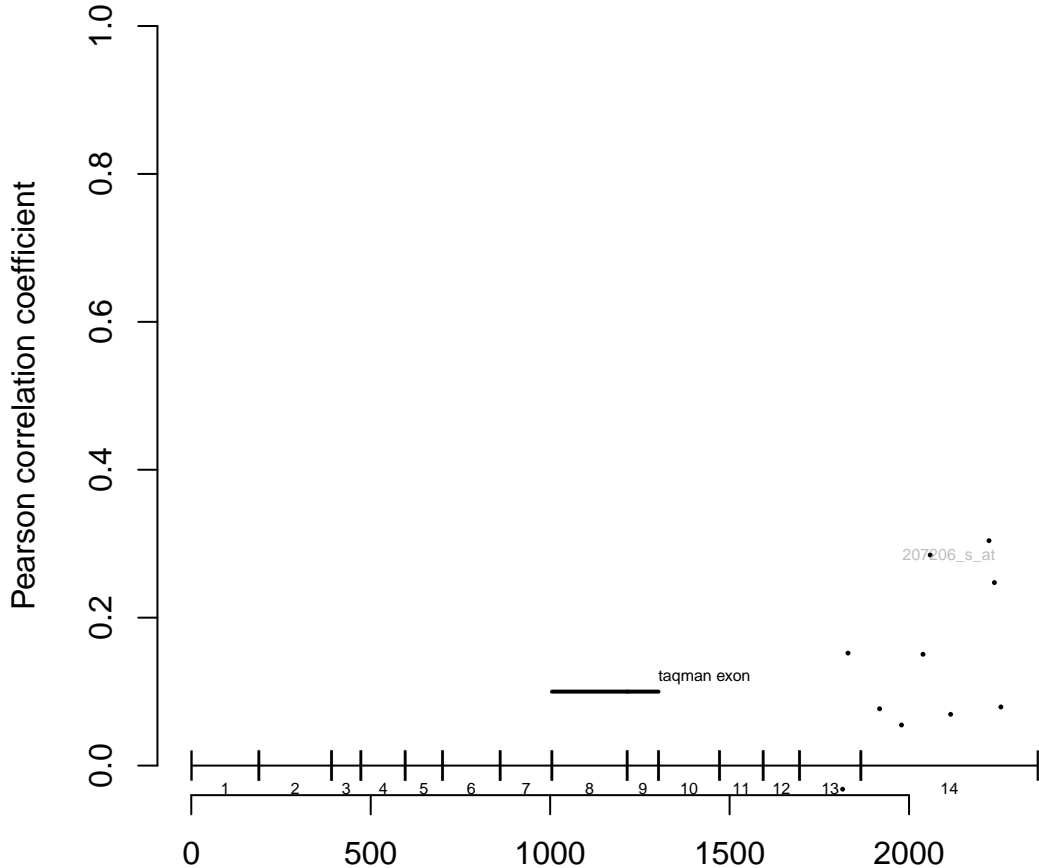

Found 1 probesets with mean correlation coefficient(s): 207206\_s\_at: 0.12

Found all probesets

Number of taqman replicate measurements with CV above threshold: 69

# Correlation of array probes and taqman

>uc001vkq.1 (EDNRB) length=4296

Each dot represents correlation to taqman of an array probe at the given location

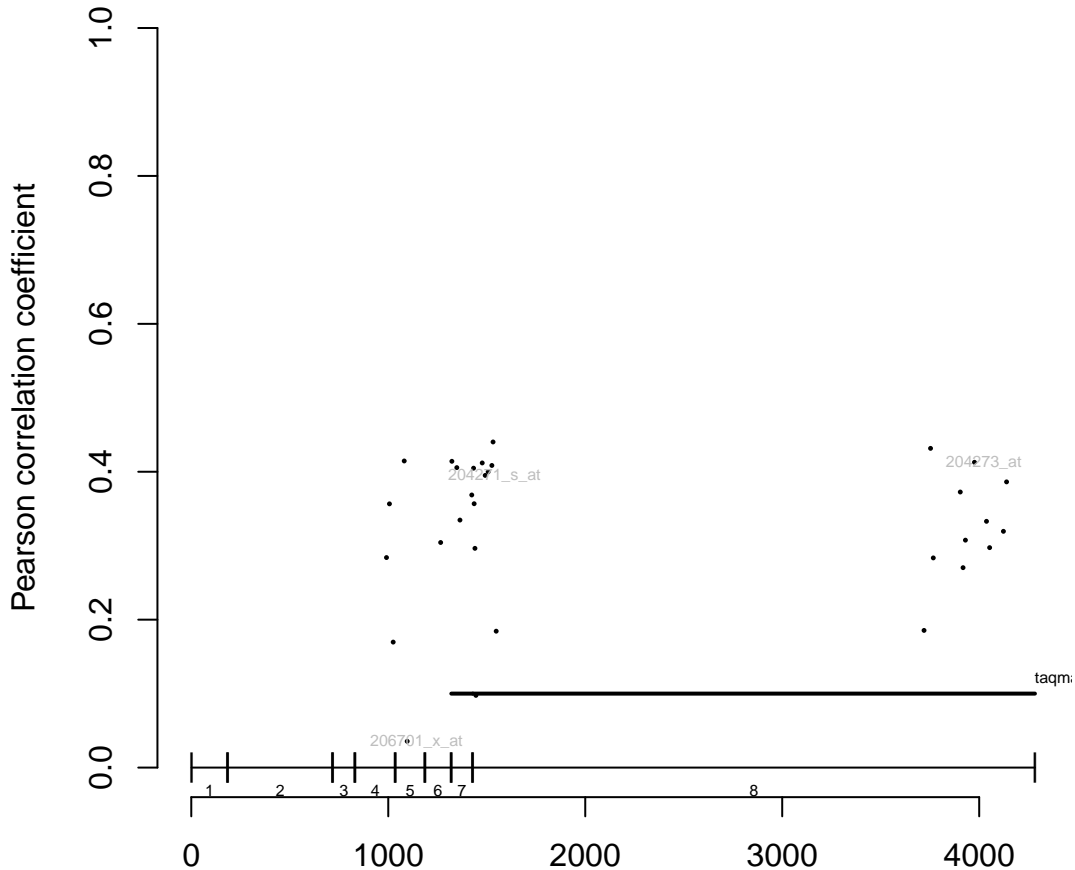

Found 3 probesets with mean correlation coefficient(s): 204271\_s\_at: 0.342 204273\_at: 0.327 206701\_x\_at: 0.289

Found all probesets

Number of taqman replicate measurements with CV above threshold: 4

# Correlation of array probes and taqman

>uc001tjn.2 (IGF1) length=7204

Each dot represents correlation to taqman of an array probe at the given location

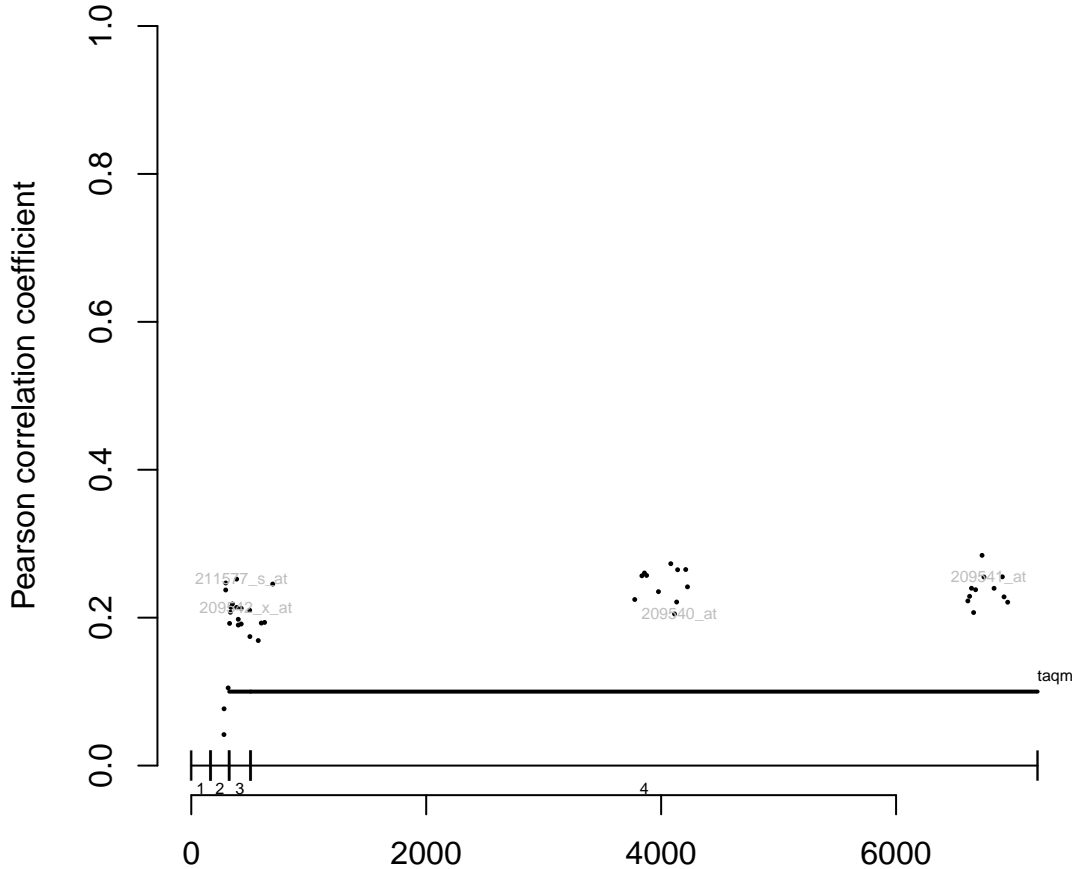

Found 4 probesets with mean correlation coefficient(s): 209540\_at: 0.246 209541\_at: 0.238 209542\_x\_at: 0.199 211577\_s\_at: 0.183

Found all probesets

Number of taqman replicate measurements with CV above threshold: 3

# Correlation of array probes and taqman

>uc001gyq.2 (ADIPOR1) length=2151 (from NM\_015999)

Each dot represents correlation to taqman of an array probe at the given location

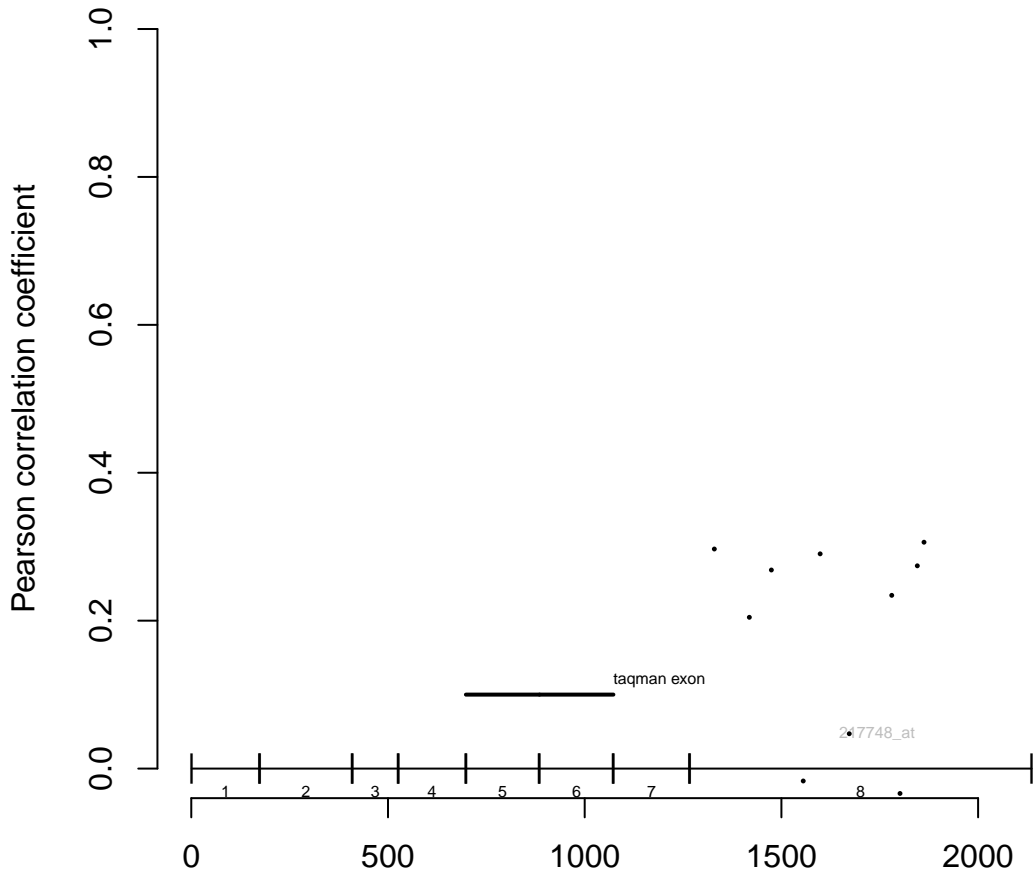

Found 1 probesets with mean correlation coefficient(s): 217748\_at: 0.18

Found all probesets

Number of taqman replicate measurements with CV above threshold: 4
